# Supplementary material for: Individual and partnership characteristics associated with consistent condom use in a cohort of cisgender men who have sex with men and transgender women in Nigeria
Source: Springer Nature journal article supplement (doi:10.1186/s12889-021-11275-w), 2021-06-30
Supplement: MOESM1 [file 19315744]

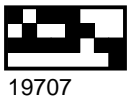

# TRUST QUESTIONNAIRE

VISIT 0

## Module 1 - Demographic and Socio Economic Information

19707

|                                                                                            |                                                                    |                                                                 |
|--------------------------------------------------------------------------------------------|--------------------------------------------------------------------|-----------------------------------------------------------------|
| Visit Date (dd/mm/yyyy) <input type="text"/> / <input type="text"/> / <input type="text"/> | Interviewer ID <input type="text"/>                                | Location: <input type="radio"/> TRUST <input type="radio"/> GRK |
| Study Number: <input type="text"/>                                                         | RDS Coupon Number used to recruit participant <input type="text"/> |                                                                 |

### "This first set of questions are about your background"

| No.  | Question                                                                                                                                      | Coded Responses (Shade in the appropriate circles)                                                                                                                                                                                                                                                                                                                                                                                            |
|------|-----------------------------------------------------------------------------------------------------------------------------------------------|-----------------------------------------------------------------------------------------------------------------------------------------------------------------------------------------------------------------------------------------------------------------------------------------------------------------------------------------------------------------------------------------------------------------------------------------------|
| 1.01 | How old are you                                                                                                                               | <i>[Age in years]</i><br>88 = Refusal<br>99 = Don't know <input type="text"/>                                                                                                                                                                                                                                                                                                                                                                 |
| 1.02 | What is the highest level of school you attended: Quranic only, Primary, Junior secondary, Senior secondary, or Higher than Senior secondary? | <input type="radio"/> 01 = Never attended school <input type="radio"/> 05 = Senior Secondary/SSS<br><input type="radio"/> 02 = Quranic only <input type="radio"/> 06 = Higher than SSS<br><input type="radio"/> 03 = Primary <input type="radio"/> 88 = Refusal<br><input type="radio"/> 04 = Junior Secondary/JSS <input type="radio"/> 99 = Don't know                                                                                      |
| 1.03 | What is your religion?                                                                                                                        | <input type="radio"/> 01 = Catholic <input type="radio"/> 05 = Other<br><input type="radio"/> 02 = Protestant/Other Christian <input type="radio"/> 88 = Refusal<br><input type="radio"/> 03 = Muslim <input type="radio"/> 99 = Don't know<br><input type="radio"/> 04 = No religion      Specify other: _____                                                                                                                               |
| 1.04 | What is the occupation from which you earn most of your income? (choose one)                                                                  | <input type="radio"/> 01 = Not Working (support from someone else) <input type="radio"/> 06 = Driver/Laborer<br><input type="radio"/> 02 = Pupil/Student (support from someone else) <input type="radio"/> 07 = Military/Police<br><input type="radio"/> 03 = Professional <input type="radio"/> 08 = Other<br><input type="radio"/> 04 = Self-employed business man<br><input type="radio"/> 05 = Entertainment/Service/Bar/Restaurant/Hotel |
| 1.05 | What was your income last month (in NGN)?                                                                                                     | <i>[Record the number in box.]</i><br>888888 = Refusal<br>999999 = Don't know <input type="text"/>                                                                                                                                                                                                                                                                                                                                            |
| 1.06 | In which LGA do you currently live?                                                                                                           | ABUJA<br><input type="radio"/> 21 = Abaji <input type="radio"/> 24 = Gwagwalada <input type="radio"/> 77 = Other<br><input type="radio"/> 22 = Abuja Municipal <input type="radio"/> 25 = Kuje <input type="radio"/> 88 = Refusal<br><input type="radio"/> 23 = Bwari <input type="radio"/> 26 = Kwali <input type="radio"/> 99 = Don't know<br>Specify other: _____                                                                          |
| 1.07 | For how many years have you lived in this same LGA?                                                                                           | <i>[Record Time in Years. If less than one year, record 00]</i><br>90 = Entire Life<br>88 = Refusal<br>99 = Don't know <input type="text"/>                                                                                                                                                                                                                                                                                                   |
| 1.08 | In the past 12 months, how many times have you been away from your home for one continuous month or more?                                     | <i>[Record Number of times]</i><br>88 = Refusal<br>99 = Don't know <input type="text"/>                                                                                                                                                                                                                                                                                                                                                       |
| 1.12 | In places where you stay currently, who stays there with you (mark all that apply)                                                            |                                                                                                                                                                                                                                                                                                                                                                                                                                               |
|      | 1.12a = No one/lives alone                                                                                                                    | <input type="radio"/> 01 = No<br><input type="radio"/> 02 = Yes<br><br><input type="radio"/> 88 = Refusal<br><input type="radio"/> 99 = Don't know                                                                                                                                                                                                                                                                                            |

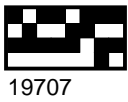

# TRUST QUESTIONNAIRE

## VISIT 0

### Module 1 - Demographic and Socio Economic Information

| No.  | Question                                                               | Coded Responses (Shade in the appropriate circles)                                                                                                                                                                                                                                                                                                                                                                                                   |
|------|------------------------------------------------------------------------|------------------------------------------------------------------------------------------------------------------------------------------------------------------------------------------------------------------------------------------------------------------------------------------------------------------------------------------------------------------------------------------------------------------------------------------------------|
|      | 1.12b = Male sexual partner                                            | <input type="radio"/> 01 = No<br><input type="radio"/> 02 = Yes<br><br><input type="radio"/> 88 = Refusal<br><input type="radio"/> 99 = Don't know                                                                                                                                                                                                                                                                                                   |
|      | 1.12c = Female sexual partner                                          | <input type="radio"/> 01 = No<br><input type="radio"/> 02 = Yes<br><br><input type="radio"/> 88 = Refusal<br><input type="radio"/> 99 = Don't know                                                                                                                                                                                                                                                                                                   |
|      | 1.12d = Parents or other older relatives                               | <input type="radio"/> 01 = No<br><input type="radio"/> 02 = Yes<br><br><input type="radio"/> 88 = Refusal<br><input type="radio"/> 99 = Don't know                                                                                                                                                                                                                                                                                                   |
|      | 1.12e = Siblings or other family members who are similar to you in age | <input type="radio"/> 01 = No<br><input type="radio"/> 02 = Yes<br><br><input type="radio"/> 88 = Refusal<br><input type="radio"/> 99 = Don't know                                                                                                                                                                                                                                                                                                   |
|      | 1.12f = Friend(s)                                                      | <input type="radio"/> 01 = No<br><input type="radio"/> 02 = Yes<br><br><input type="radio"/> 88 = Refusal<br><input type="radio"/> 99 = Don't know                                                                                                                                                                                                                                                                                                   |
|      | 1.12g = Colleague(s)                                                   | <input type="radio"/> 01 = No<br><input type="radio"/> 02 = Yes<br><br><input type="radio"/> 88 = Refusal<br><input type="radio"/> 99 = Don't know                                                                                                                                                                                                                                                                                                   |
|      | 1.12h = Other                                                          | <input type="radio"/> 01 = No<br><input type="radio"/> 02 = Yes (specify): _____<br><br><input type="radio"/> 88 = Refusal<br><input type="radio"/> 99 = Don't know                                                                                                                                                                                                                                                                                  |
| 1.13 | What do you consider your sexual orientation to be?                    | <input type="radio"/> 01 = Gay or homosexual<br><input type="radio"/> 02 = Bisexual<br><input type="radio"/> 03 = Queer<br><input type="radio"/> 04 = Heterosexual or straight<br><br><input type="radio"/> 06 = Other<br><input type="radio"/> 88 = Refusal<br><input type="radio"/> 99 = Don't know<br><br>Specify other: _____                                                                                                                    |
| 1.14 | What do you consider your gender to be?                                | <input type="radio"/> 01 = Man<br><input type="radio"/> 02 = Woman<br><input type="radio"/> 03 = Other (Specify): _____<br><input type="radio"/> 04 = Both male and female<br><input type="radio"/> 88 = Refusal<br><input type="radio"/> 99 = Don't know                                                                                                                                                                                            |
| 1.15 | What is your marital status?                                           | <input type="radio"/> 01 = Married to a woman<br><input type="radio"/> 02 = Cohabiting with a woman<br><input type="radio"/> 03 = Cohabiting with a man<br><input type="radio"/> 04 = Divorced/Separated<br><input type="radio"/> 05 = Widowed<br><br><input type="radio"/> 06 = Single/Never Married<br><input type="radio"/> 07 = Other<br><input type="radio"/> 88 = Refusal<br><input type="radio"/> 99 = Don't know<br><br>Specify other: _____ |
| 1.17 | How many children do you have?                                         | <i>[All numbers]</i><br><input type="radio"/> 88 = Refusal<br><input type="radio"/> 99 = Don't Know<br><div style="border: 1px solid black; width: 40px; height: 20px; margin-left: 100px;"></div>                                                                                                                                                                                                                                                   |
| 1.18 | Do you currently own a mobile phone?                                   | <input type="radio"/> 01 = No<br><input type="radio"/> 02 = Yes<br><br><input type="radio"/> 88 = Refusal<br><input type="radio"/> 99 = Don't know                                                                                                                                                                                                                                                                                                   |

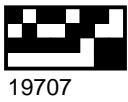

# TRUST QUESTIONNAIRE

## VISIT 0

### Module 2 - Human Rights and Exposure to Violations

| No.  | Question                           | Coded Responses (Shade in the appropriate circles)                                                                                                                                                                                                                                                                     |
|------|------------------------------------|------------------------------------------------------------------------------------------------------------------------------------------------------------------------------------------------------------------------------------------------------------------------------------------------------------------------|
|      | 1.18a = Time from home to clinic?  | 88 = Refusal<br>99 = Don't Know<br><input type="text"/> <input type="text"/> (hours) <input type="text"/> <input type="text"/> (minutes)                                                                                                                                                                               |
| 1.19 | How often do you use the internet? | <input type="radio"/> 01 = Never<br><input type="radio"/> 02 = Less than once a week<br><input type="radio"/> 03 = About once a week<br><input type="radio"/> 04 = 2 to 3 times per week<br><input type="radio"/> 05 = Almost every day<br><input type="radio"/> 88 = Refusal<br><input type="radio"/> 99 = Don't know |

### Module 2 - Human Rights and Exposure to Violations

"Now we are going to ask you questions about how you have felt or been treated by others because you have sex with men. Please do not feel bad about answering as there is no right or wrong answer, and we will not tell anyone about what you will tell us."

| No.                  | Question                                                                                                                      | Coded Responses (Shade in the appropriate circles)                                                                                                 |
|----------------------|-------------------------------------------------------------------------------------------------------------------------------|----------------------------------------------------------------------------------------------------------------------------------------------------|
| 2.01                 | Have you ever felt excluded from family gatherings because you have sex with men?                                             | <input type="radio"/> 01 = No<br><input type="radio"/> 02 = Yes<br><br><input type="radio"/> 88 = Refusal<br><input type="radio"/> 99 = Don't know |
| 2.02                 | Have you ever felt that family members have made discriminatory remarks or gossiped about you because you have sex with men?  | <input type="radio"/> 01 = No<br><input type="radio"/> 02 = Yes<br><br><input type="radio"/> 88 = Refusal<br><input type="radio"/> 99 = Don't know |
| 2.03                 | Have you ever felt rejected by your friends because you have sex with men?                                                    | <input type="radio"/> 01 = No<br><input type="radio"/> 02 = Yes<br><br><input type="radio"/> 88 = Refusal<br><input type="radio"/> 99 = Don't know |
| <b>HEALTH SYSTEM</b> |                                                                                                                               |                                                                                                                                                    |
| 2.08                 | Have you ever felt afraid to go to health care services because you worry someone may learn you have sex with men?            | <input type="radio"/> 01 = No<br><input type="radio"/> 02 = Yes<br><br><input type="radio"/> 88 = Refusal<br><input type="radio"/> 99 = Don't know |
| 2.09                 | Have you ever avoided going to health care services because you worry someone may learn you have sex with men?                | <input type="radio"/> 01 = No<br><input type="radio"/> 02 = Yes<br><br><input type="radio"/> 88 = Refusal<br><input type="radio"/> 99 = Don't know |
| 2.10                 | Have you ever been denied health services (or someone kept you from receiving health services) because you have sex with men? | <input type="radio"/> 01 = No<br><input type="radio"/> 02 = Yes<br><br><input type="radio"/> 88 = Refusal<br><input type="radio"/> 99 = Don't know |
| 2.11                 | Have you ever felt that you were not treated well in a health center because someone knew that you have sex with men?         | <input type="radio"/> 01 = No<br><input type="radio"/> 02 = Yes<br><br><input type="radio"/> 88 = Refusal<br><input type="radio"/> 99 = Don't know |
| 2.13                 | Have you ever heard health care providers gossiping about you because you have sex with men?                                  | <input type="radio"/> 01 = No<br><input type="radio"/> 02 = Yes<br><br><input type="radio"/> 88 = Refusal<br><input type="radio"/> 99 = Don't know |
| <b>SOCIETY</b>       |                                                                                                                               |                                                                                                                                                    |
| 2.16                 | Have you ever felt that the police refused to protect you because you have sex with men?                                      | <input type="radio"/> 01 = No<br><input type="radio"/> 02 = Yes<br><br><input type="radio"/> 88 = Refusal<br><input type="radio"/> 99 = Don't know |

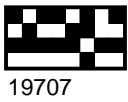

# TRUST QUESTIONNAIRE

VISIT 0

## Module 2 - Human Rights and Exposure to Violations

19707

| No.                                                                                                                                                                                                                            | Question                                                                                                                                                                            | Coded Responses (Shade in the appropriate circles)                                                                                                                                                          |
|--------------------------------------------------------------------------------------------------------------------------------------------------------------------------------------------------------------------------------|-------------------------------------------------------------------------------------------------------------------------------------------------------------------------------------|-------------------------------------------------------------------------------------------------------------------------------------------------------------------------------------------------------------|
| 2.17                                                                                                                                                                                                                           | Have you ever been arrested?                                                                                                                                                        | <input type="radio"/> 01 = No [Skip to 2.25]<br><input type="radio"/> 02 = Yes<br><br><input type="radio"/> 88 = Refusal [Skip to 2.25]<br><input type="radio"/> 99 = Don't know [Skip to 2.25]             |
| 2.17a                                                                                                                                                                                                                          | Were you arrested because you have sex with men?                                                                                                                                    | <input type="radio"/> 01 = No<br><input type="radio"/> 02 = Yes<br><br><input type="radio"/> 88 = Refusal<br><input type="radio"/> 99 = Don't know                                                          |
| 2.25                                                                                                                                                                                                                           | Have you ever felt scared to walk around in public places because you have sex with men?                                                                                            | <input type="radio"/> 01 = No<br><input type="radio"/> 02 = Yes<br><br><input type="radio"/> 88 = Refusal<br><input type="radio"/> 99 = Don't know                                                          |
| 2.26                                                                                                                                                                                                                           | Have you ever been verbally harassed and felt it was because you have sex with men?                                                                                                 | <input type="radio"/> 01 = No<br><input type="radio"/> 02 = Yes<br><br><input type="radio"/> 88 = Refusal<br><input type="radio"/> 99 = Don't know                                                          |
| 2.27                                                                                                                                                                                                                           | Have you ever been blackmailed by someone because you have sex with men?                                                                                                            | <input type="radio"/> 01 = No<br><input type="radio"/> 02 = Yes<br><br><input type="radio"/> 88 = Refusal<br><input type="radio"/> 99 = Don't know                                                          |
| 2.28                                                                                                                                                                                                                           | Have you ever been pushed, shoved, slapped, hit, kicked, choked, or otherwise physically hurt by someone?                                                                           | <input type="radio"/> 01 = No [skip to 2.35]<br><input type="radio"/> 02 = Yes<br><br><input type="radio"/> 88 = Refusal [skip to 2.35]<br><input type="radio"/> 99 = Don't know [skip to 2.35]             |
| 2.31 Who was the person who physically hurt you? I will read you the following options, and please tell me for each one whether this type of person ever beat you up or physically hurt you.                                   |                                                                                                                                                                                     |                                                                                                                                                                                                             |
| 2.31a                                                                                                                                                                                                                          | = Wife, girlfriend, or any current or past female sexual partner                                                                                                                    | <input type="radio"/> 01 = No<br><input type="radio"/> 02 = Yes<br><br><input type="radio"/> 88 = Refusal<br><input type="radio"/> 99 = Don't know                                                          |
| 2.31b                                                                                                                                                                                                                          | = Boyfriend or any current or past male sexual partner                                                                                                                              | <input type="radio"/> 01 = No<br><input type="radio"/> 02 = Yes<br><br><input type="radio"/> 88 = Refusal<br><input type="radio"/> 99 = Don't know                                                          |
| 2.32                                                                                                                                                                                                                           | Do you believe any of these experiences of physical violence was/were related to the fact that you have sex with men?                                                               | <input type="radio"/> 01 = No<br><input type="radio"/> 02 = Yes<br><br><input type="radio"/> 88 = Refusal<br><input type="radio"/> 99 = Don't know                                                          |
| 2.35                                                                                                                                                                                                                           | Have you ever been forced to have sex when you did not want to? (By forced, I mean physically forced, coerced to have sex, or penetrated with an object, when you did not want to). | <input type="radio"/> 01 = No [skip to Module 3]<br><input type="radio"/> 02 = Yes<br><br><input type="radio"/> 88 = Refusal [skip to Module 3]<br><input type="radio"/> 99 = Don't know [skip to Module 3] |
| 2.36                                                                                                                                                                                                                           | Approximately, how many times have you been forced to have sex when you did not want to?                                                                                            | <i>[Record the number of times]</i><br><input type="radio"/> 88 = Refusal<br><input type="radio"/> 99 = Don't Know                                                                                          |
| 2.37 How would you classify the person(s) who forced you to have sex? I will read you the following options, and please tell me for each one whether this type of person ever forced you to have sex when you did not want to. |                                                                                                                                                                                     |                                                                                                                                                                                                             |
| 2.37a                                                                                                                                                                                                                          | = Wife, girlfriend, or any current or past female sexual partner                                                                                                                    | <input type="radio"/> 01 = No<br><input type="radio"/> 02 = Yes<br><br><input type="radio"/> 88 = Refusal<br><input type="radio"/> 99 = Don't know                                                          |

|  |  |
|--|--|
|  |  |
|--|--|

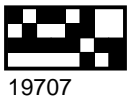

# TRUST QUESTIONNAIRE

## VISIT 0

19707

### Module 3 - Disclosure

| No. | Question                                                                                                                                                                                                           | Coded Responses (Shade in the appropriate circles)                                                                                                                                                                                                                                                                                                      |
|-----|--------------------------------------------------------------------------------------------------------------------------------------------------------------------------------------------------------------------|---------------------------------------------------------------------------------------------------------------------------------------------------------------------------------------------------------------------------------------------------------------------------------------------------------------------------------------------------------|
|     | 2.37b = Boyfriend or any current or past male sexual partner                                                                                                                                                       | <input type="radio"/> 01 = No<br><input type="radio"/> 02 = Yes<br><br><input type="radio"/> 88 = Refusal<br><input type="radio"/> 99 = Don't know                                                                                                                                                                                                      |
|     | 2.38 Do you believe any of these experiences of sexual violence were related to the fact that you have sex with men?                                                                                               | <input type="radio"/> 01 = No<br><input type="radio"/> 02 = Yes<br><br><input type="radio"/> 88 = Refusal<br><input type="radio"/> 99 = Don't know                                                                                                                                                                                                      |
|     | 2.39 Approximately, how old were you the first time you were forced to have sex when you did not want to? (age in years)                                                                                           | <i>[Record age in years]</i><br><input type="radio"/> 88 = Refusal<br><input type="radio"/> 99 = Don't Know                                                                                                                                                                                                                                             |
|     | 2.40 After someone forced you to have sex, who did you tell about this experience(s)? I will read you the following options, and please tell me for each one whether you told this person about the experience(s). |                                                                                                                                                                                                                                                                                                                                                         |
|     | 2.40a = Nobody                                                                                                                                                                                                     | <input type="radio"/> 01 = No<br><input type="radio"/> 02 = Yes [Skip to 2.41]<br><br><input type="radio"/> 88 = Refusal<br><input type="radio"/> 99 = Don't know                                                                                                                                                                                       |
|     | 2.40b = Wife, girlfriend or female partner                                                                                                                                                                         | <input type="radio"/> 01 = No<br><input type="radio"/> 02 = Yes<br><br><input type="radio"/> 88 = Refusal<br><input type="radio"/> 99 = Don't know                                                                                                                                                                                                      |
|     | 2.40c = Boyfriend or partner                                                                                                                                                                                       | <input type="radio"/> 01 = No<br><input type="radio"/> 02 = Yes<br><br><input type="radio"/> 88 = Refusal<br><input type="radio"/> 99 = Don't know                                                                                                                                                                                                      |
|     | 2.41 Was the person who forced you to have sex ever arrested by the police for this?                                                                                                                               | <input type="radio"/> 01 = No, none of the perpetrators were arrested <input type="radio"/> 04 = Other<br><input type="radio"/> 02 = Yes, all of the perpetrators were arrested <input type="radio"/> 88 = Refusal<br><input type="radio"/> 03 = Yes, but not all of the perpetrators <input type="radio"/> 99 = Don't know<br><br>Specify other: _____ |
|     | 2.42 When was the last time you were forced to have sex against your will?                                                                                                                                         | <input type="radio"/> 01 = Within the last 12 months<br><input type="radio"/> 02 = More than 12 months ago<br><br><input type="radio"/> 88 = Refusal<br><input type="radio"/> 99 = Don't know                                                                                                                                                           |

### Module 3 - Disclosure

DISCLOSURE - Now I want to ask about people you may or may not have told about having sex with men or about being attracted to other men.

| No.  | Question                                                                                                                                                 | Coded Responses (Shade in the appropriate circles)                                                                                                 |
|------|----------------------------------------------------------------------------------------------------------------------------------------------------------|----------------------------------------------------------------------------------------------------------------------------------------------------|
| 3.01 | Have you told any member of your family that you have sex with other men or that you are attracted to other men?                                         | <input type="radio"/> 01 = No<br><input type="radio"/> 02 = Yes<br><br><input type="radio"/> 88 = Refusal<br><input type="radio"/> 99 = Don't know |
| 3.02 | Does anyone in your family know that you have sex with other men or that you are attracted to other men, including those you may not have told yourself? | <input type="radio"/> 01 = No<br><input type="radio"/> 02 = Yes<br><br><input type="radio"/> 88 = Refusal<br><input type="radio"/> 99 = Don't know |
| 3.03 | Have you told any health care worker that you have sex with other men or that you are attracted to other men?                                            | <input type="radio"/> 01 = No<br><input type="radio"/> 02 = Yes<br><br><input type="radio"/> 88 = Refusal<br><input type="radio"/> 99 = Don't know |

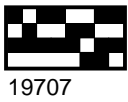

# TRUST QUESTIONNAIRE

## Module 4 - RISK BEHAVIOR - A. PARTNERS

VISIT 0

"I'd like to start by asking you about your sexual partners and behaviors. Please do not feel bad about answering as there is no right or wrong answer and we will do our best to ensure that no one finds out what you have told us. Unless otherwise specified, when I ask about condom use, I mean male or female condoms, it was a new condom that was used each time, and the condom was used for the entire penetrative sexual act. When I ask about sex with other men I mean anal sex unless otherwise specified. When I ask about anal sex, I mean either insertive ("top") or receptive ("bottom") unless otherwise specified. When I ask about oral sex, I mean giving or receiving."

| No.  | Question                                                                             | Coded Responses (Shade in the appropriate circles)                                                                                                                                                                                                                                                                                                      |
|------|--------------------------------------------------------------------------------------|---------------------------------------------------------------------------------------------------------------------------------------------------------------------------------------------------------------------------------------------------------------------------------------------------------------------------------------------------------|
| 4.01 | What was the gender of the first person you ever had sex with (other than oral sex)? | <input type="radio"/> 01 = Man<br><input type="radio"/> 02 = Woman<br><br><input type="radio"/> 88 = Refusal<br><input type="radio"/> 99 = Don't know                                                                                                                                                                                                   |
| 4.02 | Approximately how old were you the first time you had anal sex with another man?     | <i>[Record age in years]</i><br><input type="radio"/> 88 = Refusal<br><input type="radio"/> 99 = Don't Know                                                                                                                                                                                                                                             |
| 4.03 | Who was the first man you ever had anal sex with?                                    | <input type="radio"/> 01 = Boyfriend<br><input type="radio"/> 02 = Friend<br><input type="radio"/> 03 = Colleague<br><input type="radio"/> 04 = Family member<br><br><input type="radio"/> 05 = Stranger<br><input type="radio"/> 06 = Other<br><input type="radio"/> 88 = Refusal<br><input type="radio"/> 99 = Don't know<br><br>Specify other: _____ |
| 4.04 | Have you ever had anal sex without a condom?                                         | <input type="radio"/> 01 = No<br><input type="radio"/> 02 = Yes<br><br><input type="radio"/> 88 = Refusal<br><input type="radio"/> 99 = Don't know                                                                                                                                                                                                      |

**Now I want to ask you about your sexual experiences with men.**

|      |                                                                                                                                                                                                     |                                                                                                                                                    |
|------|-----------------------------------------------------------------------------------------------------------------------------------------------------------------------------------------------------|----------------------------------------------------------------------------------------------------------------------------------------------------|
| 4.05 | Where (in what type of place) do you meet new male sexual partners? I will read you a list of possible places. For each one, please tell me whether you meet new male sexual partners there or not. |                                                                                                                                                    |
|      | 4.05a = Private Home                                                                                                                                                                                | <input type="radio"/> 01 = No<br><input type="radio"/> 02 = Yes<br><br><input type="radio"/> 88 = Refusal<br><input type="radio"/> 99 = Don't know |
|      | 4.05b = Bar or club                                                                                                                                                                                 | <input type="radio"/> 01 = No<br><input type="radio"/> 02 = Yes<br><br><input type="radio"/> 88 = Refusal<br><input type="radio"/> 99 = Don't know |
|      | 4.05c = Private party                                                                                                                                                                               | <input type="radio"/> 01 = No<br><input type="radio"/> 02 = Yes<br><br><input type="radio"/> 88 = Refusal<br><input type="radio"/> 99 = Don't know |
|      | 4.05d = Brothel                                                                                                                                                                                     | <input type="radio"/> 01 = No<br><input type="radio"/> 02 = Yes<br><br><input type="radio"/> 88 = Refusal<br><input type="radio"/> 99 = Don't know |
|      | 4.05e = Street or park                                                                                                                                                                              | <input type="radio"/> 01 = No<br><input type="radio"/> 02 = Yes<br><br><input type="radio"/> 88 = Refusal<br><input type="radio"/> 99 = Don't know |
|      | 4.05f = Private vehicle                                                                                                                                                                             | <input type="radio"/> 01 = No<br><input type="radio"/> 02 = Yes<br><br><input type="radio"/> 88 = Refusal<br><input type="radio"/> 99 = Don't know |
|      | 4.05g = Hotel or guest house                                                                                                                                                                        | <input type="radio"/> 01 = No<br><input type="radio"/> 02 = Yes<br><br><input type="radio"/> 88 = Refusal<br><input type="radio"/> 99 = Don't know |

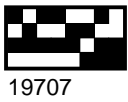

19707

# TRUST QUESTIONNAIRE

## Module 4 - RISK BEHAVIOR - A. PARTNERS

VISIT 0

| No.                                                                                                                   | Question                                                                                                     | Coded Responses (Shade in the appropriate circles)                                                                                                                                                                                                                                                                                                                |
|-----------------------------------------------------------------------------------------------------------------------|--------------------------------------------------------------------------------------------------------------|-------------------------------------------------------------------------------------------------------------------------------------------------------------------------------------------------------------------------------------------------------------------------------------------------------------------------------------------------------------------|
|                                                                                                                       | 4.05h = News advertisements or cards                                                                         | <input type="radio"/> 01 = No<br><input type="radio"/> 02 = Yes<br><br><input type="radio"/> 88 = Refusal<br><input type="radio"/> 99 = Don't know                                                                                                                                                                                                                |
|                                                                                                                       | 4.05i = Online                                                                                               | <input type="radio"/> 01 = No<br><input type="radio"/> 02 = Yes<br><br><input type="radio"/> 88 = Refusal<br><input type="radio"/> 99 = Don't know                                                                                                                                                                                                                |
|                                                                                                                       | 4.05j = School or work                                                                                       | <input type="radio"/> 01 = No<br><input type="radio"/> 02 = Yes<br><br><input type="radio"/> 88 = Refusal<br><input type="radio"/> 99 = Don't know                                                                                                                                                                                                                |
|                                                                                                                       | 4.05k = Mosque or church                                                                                     | <input type="radio"/> 01 = No<br><input type="radio"/> 02 = Yes<br><br><input type="radio"/> 88 = Refusal<br><input type="radio"/> 99 = Don't know                                                                                                                                                                                                                |
|                                                                                                                       | 4.05l = Other (specify)                                                                                      | <input type="radio"/> 01 = No<br><input type="radio"/> 02 = Yes (specify): _____<br><br><input type="radio"/> 88 = Refusal<br><input type="radio"/> 99 = Don't know                                                                                                                                                                                               |
| <b>Now I will ask you some questions about your experiences in the last 12 months with your male sexual partners.</b> |                                                                                                              |                                                                                                                                                                                                                                                                                                                                                                   |
| 4.07                                                                                                                  | In the last 12 months, how many men did you have oral sex with?                                              | <i>[Record the number of men. If 00 skip to 4.09]</i><br><br>888 = Refusal <i>[skip to 4.09]</i><br>999 = Don't know <i>[skip to 4.09]</i> <div style="float: right; border: 1px solid black; width: 30px; height: 20px; margin-left: 10px;"></div>                                                                                                               |
|                                                                                                                       | 4.08 In the last 12 months, of the times you had oral sex with another man, how often was a condom used?     | <input type="radio"/> 01 = Never<br><input type="radio"/> 02 = Almost never<br><input type="radio"/> 03 = About half the time<br><input type="radio"/> 04 = Almost always<br><br><input type="radio"/> 05 = Always<br><input type="radio"/> 88 = Refusal<br><input type="radio"/> 99 = Don't know                                                                 |
| 4.09                                                                                                                  | In the last 12 months, how many men did you have anal sex with?                                              | <i>[Record the number of men. If 000 skip to 4.32]</i><br><br>888 = Refusal <i>[skip to 4.32]</i><br>999 = Don't know <i>[skip to 4.32]</i> <div style="float: right; border: 1px solid black; width: 30px; height: 20px; margin-left: 10px;"></div>                                                                                                              |
|                                                                                                                       | 4.09d In the last 12 months, did you only have anal sex with men who have the same HIV status as you?        | <input type="radio"/> 01 = No<br><input type="radio"/> 02 = Yes<br><br><input type="radio"/> 88 = Refusal<br><input type="radio"/> 99 = Don't know                                                                                                                                                                                                                |
|                                                                                                                       | 4.09e How often do you use condoms when you have anal sex with men of the same HIV status as you?            | <input type="radio"/> 01 = Never<br><input type="radio"/> 02 = Almost never<br><input type="radio"/> 03 = About half the time<br><input type="radio"/> 04 = Almost always<br><br><input type="radio"/> 05 = Always<br><input type="radio"/> 88 = Refusal<br><input type="radio"/> 99 = Don't know                                                                 |
|                                                                                                                       | 4.09f In the last 12 months, what type of anal sex do you engage in with your sexual partners?               | <input type="radio"/> 01 = Only insertive<br><input type="radio"/> 02 = Only receptive<br><input type="radio"/> 03 = Both insertive and receptive<br><input type="radio"/> 88 = Refusal<br><input type="radio"/> 99 = Don't know                                                                                                                                  |
| 4.10                                                                                                                  | Thinking of the times you have had anal sex with a man, was there a time when a condom slipped off or broke? | <input type="radio"/> 01 = No <i>[skip to 4.12]</i><br><input type="radio"/> 02 = Yes, in the last month<br><input type="radio"/> 03 = Yes, in the last 12 months<br><input type="radio"/> 04 = Yes, but not in the last 12 months<br><br><input type="radio"/> 88 = Refusal <i>[skip to 4.12]</i><br><input type="radio"/> 99 = Don't know <i>[skip to 4.12]</i> |
|                                                                                                                       | 4.11 When you have used a condom during anal sex with a man, how often has the condom slipped off or broken? | <input type="radio"/> 01 = Never<br><input type="radio"/> 02 = Almost never<br><input type="radio"/> 03 = About half the time<br><input type="radio"/> 04 = Almost always<br><br><input type="radio"/> 05 = Always<br><input type="radio"/> 88 = Refusal<br><input type="radio"/> 99 = Don't know                                                                 |

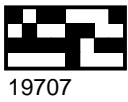

# TRUST QUESTIONNAIRE

## Module 4 - RISK BEHAVIOR - A. PARTNERS

VISIT 0

| No.  | Question                                                                                                                                                                                                                                                                                                                | Coded Responses (Shade in the appropriate circles)                                                                                                                                                                                                                                                                                                                                                                                                   |
|------|-------------------------------------------------------------------------------------------------------------------------------------------------------------------------------------------------------------------------------------------------------------------------------------------------------------------------|------------------------------------------------------------------------------------------------------------------------------------------------------------------------------------------------------------------------------------------------------------------------------------------------------------------------------------------------------------------------------------------------------------------------------------------------------|
| 4.12 | In the last 12 months, how many men did you have insertive anal sex with? [Insertive sex means anal sex when YOU inserted your penis into your partner's anus. Some people call this being 'the top']                                                                                                                   | <p><i>[Record the number of men. If 00 skip to 4.15]</i></p> <div style="text-align: right; border: 1px solid black; width: 60px; height: 20px; margin-left: auto;"></div> <p>888 = Refusal <i>[skip to 4.15]</i><br/>999 = Don't know <i>[skip to 4.15]</i></p>                                                                                                                                                                                     |
| 4.13 | In the last 12 months, of the times you had insertive anal sex with a man, how often were condoms used?                                                                                                                                                                                                                 | <p> <input type="radio"/> 01 = Never <i>[skip to 4.15]</i>                      <input type="radio"/> 05 = Always<br/> <input type="radio"/> 02 = Almost never                              <input type="radio"/> 88 = Refusal <i>[skip to 4.15]</i><br/> <input type="radio"/> 03 = About half the time                      <input type="radio"/> 99 = Don't know <i>[skip to 4.15]</i><br/> <input type="radio"/> 04 = Almost always         </p> |
| 4.15 | In the last 12 months, how many men did you have receptive anal sex with? [Receptive sex means anal sex when your partner inserted HIS penis into your anus. Some people call this being 'the bottom']                                                                                                                  | <p><i>[Record the number of men. If 00 skip to 4.18]</i></p> <div style="text-align: right; border: 1px solid black; width: 60px; height: 20px; margin-left: auto;"></div> <p>888 = Refusal <i>[skip to 4.18]</i><br/>999 = Don't know <i>[skip to 4.18]</i></p>                                                                                                                                                                                     |
| 4.16 | In the last 12 months, of the times you had receptive anal sex with a man, how often were condoms used?                                                                                                                                                                                                                 | <p> <input type="radio"/> 01 = Never                                              <input type="radio"/> 05 = Always<br/> <input type="radio"/> 02 = Almost never                                      <input type="radio"/> 88 = Refusal<br/> <input type="radio"/> 03 = About half the time                              <input type="radio"/> 99 = Don't know<br/> <input type="radio"/> 04 = Almost always         </p>                           |
| 4.18 | In the last 12 months, of the men you've had anal sex with (either insertive or receptive), how many of them were main partners? By main partner, I mean a man that you have sex with and with whom you feel committed to. This means a partner that you would call your boyfriend, significant other, or life partner. | <p><i>[Record the number of men. If 00 skip to 4.24]</i></p> <div style="text-align: right; border: 1px solid black; width: 60px; height: 20px; margin-left: auto;"></div> <p>888 = Refusal <i>[skip to 4.24]</i><br/>999 = Don't know <i>[skip to 4.24]</i></p>                                                                                                                                                                                     |
| 4.19 | In the last 12 months, have you talked with your main male sexual partner(s) about sexually transmitted infections and HIV?                                                                                                                                                                                             | <p> <input type="radio"/> 01 = No<br/> <input type="radio"/> 02 = With some but not all main male partners<br/> <input type="radio"/> 03 = Yes, with all main male partners (or with the only one)<br/> <input type="radio"/> 88 = Refusal<br/> <input type="radio"/> 99 = Don't know         </p>                                                                                                                                                   |
| 4.20 | In the last 12 months, have you talked with your main male sexual partner(s) about their HIV status? (By this, I mean you ask or they tell you they have been tested and tell you the results, regardless of whether positive or negative)?                                                                             | <p> <input type="radio"/> 01 = No<br/> <input type="radio"/> 02 = With some but not all main male partners<br/> <input type="radio"/> 03 = Yes, with all main male partners (or with the only one)<br/> <input type="radio"/> 88 = Refusal<br/> <input type="radio"/> 99 = Don't know         </p>                                                                                                                                                   |
| 4.21 | In the last 12 months, have you talked with your main male sexual partner(s) about your HIV status? (By this, I mean they ask or you tell them you have been tested and tell them the results, regardless of whether positive or negative)                                                                              | <p> <input type="radio"/> 01 = No<br/> <input type="radio"/> 02 = With some but not all main male partners<br/> <input type="radio"/> 03 = Yes, with all main male partners (or with the only one)<br/> <input type="radio"/> 88 = Refusal<br/> <input type="radio"/> 99 = Don't know         </p>                                                                                                                                                   |
| 4.22 | Was a condom used the last time that you had anal sex with your main male partner(s)?                                                                                                                                                                                                                                   | <p> <input type="radio"/> 01 = No<br/> <input type="radio"/> 02 = Yes<br/> <br/> <input type="radio"/> 88 = Refusal<br/> <input type="radio"/> 99 = Don't know         </p>                                                                                                                                                                                                                                                                          |
| 4.23 | How often are condoms used when you have anal sex with men who are your main male partner(s)?                                                                                                                                                                                                                           | <p> <input type="radio"/> 01 = Never                                              <input type="radio"/> 05 = Always<br/> <input type="radio"/> 02 = Almost never                                      <input type="radio"/> 88 = Refusal<br/> <input type="radio"/> 03 = About half the time                              <input type="radio"/> 99 = Don't know<br/> <input type="radio"/> 04 = Almost always         </p>                           |
| 4.24 | Of the men you've had anal sex with in the last 12 months, approximately how many of them were casual partners? By casual partner, this means a man that you have sex with, but you don't feel committed to.                                                                                                            | <p><i>[Record the number of men. If 000 skip to 4.30]</i></p> <div style="text-align: right; border: 1px solid black; width: 60px; height: 20px; margin-left: auto;"></div> <p>888 = Refusal <i>[skip to 4.30]</i><br/>999 = Don't know <i>[skip to 4.30]</i></p>                                                                                                                                                                                    |
| 4.25 | In the last 12 months, have you talked with your casual male sexual partner(s) about sexually transmitted infections and HIV?                                                                                                                                                                                           | <p> <input type="radio"/> 01 = No<br/> <input type="radio"/> 02 = With some but not all casual male partners<br/> <input type="radio"/> 03 = Yes, with all casual male partners (or with the only one)<br/> <input type="radio"/> 88 = Refusal<br/> <input type="radio"/> 99 = Don't know         </p>                                                                                                                                               |



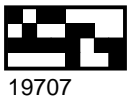

# TRUST QUESTIONNAIRE

## Module 4 - RISK BEHAVIOR - A. PARTNERS

VISIT 0

| No.                                                                                   | Question                                                                                                                                                                                                                                                                     | Coded Responses (Shade in the appropriate circles)                                                                                                                                                                                                                                                                                                  |
|---------------------------------------------------------------------------------------|------------------------------------------------------------------------------------------------------------------------------------------------------------------------------------------------------------------------------------------------------------------------------|-----------------------------------------------------------------------------------------------------------------------------------------------------------------------------------------------------------------------------------------------------------------------------------------------------------------------------------------------------|
|                                                                                       | <p><b>4.26</b> In the last 12 months, have you talked with your casual male sexual partner(s) about their HIV status?<br/> <i>(By this, I mean you ask or they tell you they have been tested and tell you the results, regardless of whether positive or negative)?</i></p> | <input type="radio"/> 01 = No<br><input type="radio"/> 02 = With some but not all casual male partners<br><input type="radio"/> 03 = Yes, with all casual male partners (or with the only one)<br><input type="radio"/> 88 = Refusal<br><input type="radio"/> 99 = Don't know                                                                       |
|                                                                                       | <p><b>4.27</b> In the last 12 months, have you talked with your casual male sexual partner(s) about your HIV status?<br/> <i>(By this, I mean they ask or you tell them you have been tested and tell them the results, regardless of whether positive or negative)</i></p>  | <input type="radio"/> 01 = No<br><input type="radio"/> 02 = With some but not all casual male partners<br><input type="radio"/> 03 = Yes, with all casual male partners (or with the only one)<br><input type="radio"/> 88 = Refusal<br><input type="radio"/> 99 = Don't know                                                                       |
|                                                                                       | <p><b>4.28</b> Was a condom used the last time that you had anal sex with a man who was a casual partner?</p>                                                                                                                                                                | <input type="radio"/> 01 = No<br><input type="radio"/> 02 = Yes<br><br><input type="radio"/> 88 = Refusal<br><input type="radio"/> 99 = Don't know                                                                                                                                                                                                  |
|                                                                                       | <p><b>4.29</b> How often are condoms used when you have anal sex with men who are casual partners?</p>                                                                                                                                                                       | <input type="radio"/> 01 = Never<br><input type="radio"/> 02 = Almost never<br><input type="radio"/> 03 = About half the time<br><input type="radio"/> 04 = Almost always<br><br><input type="radio"/> 05 = Always<br><input type="radio"/> 88 = Refusal<br><input type="radio"/> 99 = Don't know                                                   |
| 4.30                                                                                  | <p>Thinking about when you had sex with any men in the last 12 months, how many men did you have anal or oral sex with in exchange for things you wanted or needed such as money, drugs, food, shelter or transportation?</p>                                                | <p><i>[Record the number of men. If 000, skip to 4.31]</i></p> <p>888 = Refusal <i>[skip to 4.31]</i><br/>           999 = Don't know <i>[skip to 4.31]</i></p> <div style="border: 1px solid black; width: 60px; height: 20px; margin-left: auto; margin-right: 0;"></div>                                                                         |
|                                                                                       | <p><b>4.30a</b> Were you paid money?</p>                                                                                                                                                                                                                                     | <input type="radio"/> 01 = No<br><input type="radio"/> 02 = Yes<br><br><input type="radio"/> 88 = Refusal<br><input type="radio"/> 99 = Don't know                                                                                                                                                                                                  |
|                                                                                       | <p><b>4.30b</b> How would you classify the men who <u>gave you</u> money or things you needed for anal or oral sex?</p>                                                                                                                                                      | <input type="radio"/> 01 = Boyfriend<br><input type="radio"/> 02 = Friend<br><input type="radio"/> 03 = Colleague<br><input type="radio"/> 04 = Family member<br><br><input type="radio"/> 05 = Stranger<br><input type="radio"/> 06 = Other<br><input type="radio"/> 88 = Refusal<br><input type="radio"/> 99 = Don't know<br><br>(specify): _____ |
| 4.31                                                                                  | <p>Thinking about when you had sex with any men in the last 12 months, how many men did you have anal or oral sex with in exchange for things they wanted or needed such as money, drugs, food, shelter or transportation?</p>                                               | <p><i>[Record the number of men. If 000, skip to 4.32]</i></p> <p>888 = Refusal <i>[skip to 4.32]</i><br/>           999 = Don't know <i>[skip to 4.32]</i></p> <div style="border: 1px solid black; width: 60px; height: 20px; margin-left: auto; margin-right: 0;"></div>                                                                         |
|                                                                                       | <p><b>4.31a</b> Did you pay money?</p>                                                                                                                                                                                                                                       | <input type="radio"/> 01 = No<br><input type="radio"/> 02 = Yes<br><br><input type="radio"/> 88 = Refusal<br><input type="radio"/> 99 = Don't know                                                                                                                                                                                                  |
|                                                                                       | <p><b>4.31b</b> How would you classify the men who <u>you gave</u> money or things they needed for anal or oral sex?</p>                                                                                                                                                     | <input type="radio"/> 01 = Boyfriend<br><input type="radio"/> 02 = Friend<br><input type="radio"/> 03 = Colleague<br><input type="radio"/> 04 = Family member<br><br><input type="radio"/> 05 = Stranger<br><input type="radio"/> 06 = Other<br><input type="radio"/> 88 = Refusal<br><input type="radio"/> 99 = Don't know<br><br>(specify): _____ |
| <b>Now I want to ask you about your sexual experiences with men in the last month</b> |                                                                                                                                                                                                                                                                              |                                                                                                                                                                                                                                                                                                                                                     |
| 4.32                                                                                  | <p>In the last month approximately how many male partners did you have any type of sex with?</p>                                                                                                                                                                             | <p><i>[Record the number of male partners]</i></p> <p>88 = Refusal<br/>           99 = Don't know</p> <div style="border: 1px solid black; width: 40px; height: 20px; margin-left: auto; margin-right: 0;"></div>                                                                                                                                   |

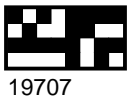

19707

# TRUST QUESTIONNAIRE

## Module 4 - RISK BEHAVIOR - A. PARTNERS

VISIT 0

| No.  | Question                                                                                                                                                                                                                                                 | Coded Responses (Shade in the appropriate circles)                                                                                                                                                                                                                                                                           |
|------|----------------------------------------------------------------------------------------------------------------------------------------------------------------------------------------------------------------------------------------------------------|------------------------------------------------------------------------------------------------------------------------------------------------------------------------------------------------------------------------------------------------------------------------------------------------------------------------------|
| 4.33 | In the last month approximately how many male partners did you have anal sex with?                                                                                                                                                                       | <p><i>[Record the number of male partners]</i></p> <div style="float: right; border: 1px solid black; width: 40px; height: 20px; margin-left: auto;"></div> <p>88 = Refusal<br/>99 = Don't know</p>                                                                                                                          |
| 4.34 | In the last month how often were condoms used when you had anal sex with male partners?                                                                                                                                                                  | <p><input type="radio"/> 01 = Never</p> <p><input type="radio"/> 02 = Almost never</p> <p><input type="radio"/> 03 = About half the time</p> <p><input type="radio"/> 04 = Almost always</p> <p><input type="radio"/> 05 = Always</p> <p><input type="radio"/> 88 = Refusal</p> <p><input type="radio"/> 99 = Don't know</p> |
| 4.35 | Now think about the last time you had anal sex with a male partner. Was a condom used at that time?                                                                                                                                                      | <p><input type="radio"/> 01 = No</p> <p><input type="radio"/> 02 = Yes</p> <p><input type="radio"/> 88 = Refusal</p> <p><input type="radio"/> 99 = Don't know</p>                                                                                                                                                            |
| 4.36 | Now think about the last time a condom was not used with a male partner during anal sex. Why wasn't a condom used at that time? I will read some possible reasons, and for each one please tell me whether that reason applies to your situation or not. |                                                                                                                                                                                                                                                                                                                              |
|      | 4.36b = We forgot or didn't think about it                                                                                                                                                                                                               | <p><input type="radio"/> 01 = No</p> <p><input type="radio"/> 02 = Yes</p> <p><input type="radio"/> 88 = Refusal</p> <p><input type="radio"/> 99 = Don't know</p>                                                                                                                                                            |
|      | 4.36c = There were no condoms available                                                                                                                                                                                                                  | <p><input type="radio"/> 01 = No</p> <p><input type="radio"/> 02 = Yes</p> <p><input type="radio"/> 88 = Refusal</p> <p><input type="radio"/> 99 = Don't know</p>                                                                                                                                                            |
|      | 4.36d = There was no time to find a condom                                                                                                                                                                                                               | <p><input type="radio"/> 01 = No</p> <p><input type="radio"/> 02 = Yes</p> <p><input type="radio"/> 88 = Refusal</p> <p><input type="radio"/> 99 = Don't know</p>                                                                                                                                                            |
|      | 4.36e = I don't like using condoms                                                                                                                                                                                                                       | <p><input type="radio"/> 01 = No</p> <p><input type="radio"/> 02 = Yes</p> <p><input type="radio"/> 88 = Refusal</p> <p><input type="radio"/> 99 = Don't know</p>                                                                                                                                                            |
|      | 4.36g = I do not feel comfortable buying condoms                                                                                                                                                                                                         | <p><input type="radio"/> 01 = No</p> <p><input type="radio"/> 02 = Yes</p> <p><input type="radio"/> 88 = Refusal</p> <p><input type="radio"/> 99 = Don't know</p>                                                                                                                                                            |
|      | 4.36h = Condoms are not necessary                                                                                                                                                                                                                        | <p><input type="radio"/> 01 = No</p> <p><input type="radio"/> 02 = Yes</p> <p><input type="radio"/> 88 = Refusal</p> <p><input type="radio"/> 99 = Don't know</p>                                                                                                                                                            |
|      | 4.36i = I don't trust condoms                                                                                                                                                                                                                            | <p><input type="radio"/> 01 = No</p> <p><input type="radio"/> 02 = Yes</p> <p><input type="radio"/> 88 = Refusal</p> <p><input type="radio"/> 99 = Don't know</p>                                                                                                                                                            |
|      | 4.36j = I used another method to prevent HIV or sexually transmitted infection (specify method)                                                                                                                                                          | <p><input type="radio"/> 01 = No</p> <p><input type="radio"/> 02 = Yes (specify): _____</p> <p><input type="radio"/> 88 = Refusal</p> <p><input type="radio"/> 99 = Don't know</p>                                                                                                                                           |
|      | 4.36k = If I used or suggested using a condom, my partner would think I have an infection                                                                                                                                                                | <p><input type="radio"/> 01 = No</p> <p><input type="radio"/> 02 = Yes</p> <p><input type="radio"/> 88 = Refusal</p> <p><input type="radio"/> 99 = Don't know</p>                                                                                                                                                            |

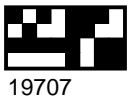

# TRUST QUESTIONNAIRE

## VISIT 0

### Module 4 - RISK BEHAVIOR - A. FEMALE PARTNERS

| No.                                                                                                              | Question                                                                                                                  | Coded Responses (Shade in the appropriate circles)                                                                                                                                                                                                                                                                                               |
|------------------------------------------------------------------------------------------------------------------|---------------------------------------------------------------------------------------------------------------------------|--------------------------------------------------------------------------------------------------------------------------------------------------------------------------------------------------------------------------------------------------------------------------------------------------------------------------------------------------|
|                                                                                                                  | 4.36l = My partner doesn't like them or objected                                                                          | <input type="radio"/> 01 = No<br><input type="radio"/> 02 = Yes<br><br><input type="radio"/> 88 = Refusal<br><input type="radio"/> 99 = Don't know                                                                                                                                                                                               |
|                                                                                                                  | 4.36m = My partner is/was a safe partner                                                                                  | <input type="radio"/> 01 = No<br><input type="radio"/> 02 = Yes<br><br><input type="radio"/> 88 = Refusal<br><input type="radio"/> 99 = Don't know                                                                                                                                                                                               |
|                                                                                                                  | 4.36n = My partner removed the condom                                                                                     | <input type="radio"/> 01 = No<br><input type="radio"/> 02 = Yes<br><br><input type="radio"/> 88 = Refusal<br><input type="radio"/> 99 = Don't know                                                                                                                                                                                               |
|                                                                                                                  | 4.36q = The sex was forced                                                                                                | <input type="radio"/> 01 = No<br><input type="radio"/> 02 = Yes<br><br><input type="radio"/> 88 = Refusal<br><input type="radio"/> 99 = Don't know                                                                                                                                                                                               |
|                                                                                                                  | 4.36s = Other (specify)                                                                                                   | <input type="radio"/> 01 = No<br><input type="radio"/> 02 = Yes (specify): _____<br><br><input type="radio"/> 88 = Refusal<br><input type="radio"/> 99 = Don't know                                                                                                                                                                              |
| 4.37                                                                                                             | Counting all of your male partners, in an average week, approximately how many times do you have anal sex with a man?     | <i>[Record the number of sex acts]</i><br><br><input type="text"/> <input type="text"/><br>88 = Refusal<br>99 = Don't know                                                                                                                                                                                                                       |
| <b>Module 4B: FEMALE PARTNERS</b><br><b>"Next I am going to ask you about your female sexual partners."</b>      |                                                                                                                           |                                                                                                                                                                                                                                                                                                                                                  |
| 4.38                                                                                                             | Have you ever had any type of sex with a woman?                                                                           | <input type="radio"/> 01 = No [skip to 4.74]<br><input type="radio"/> 02 = Yes, within the past 5 years<br><input type="radio"/> 03 = Yes, but not in the past 5 years<br><input type="radio"/> 88 = Refusal [skip to 4.74]<br><input type="radio"/> 99 = Don't know [skip to 4.74]                                                              |
| 4.39                                                                                                             | Approximately how old were you the first time you had any type of sex with a woman?                                       | <i>[Record age in years]</i><br><br><input type="text"/> <input type="text"/><br>88 = Refusal<br>99 = Don't know                                                                                                                                                                                                                                 |
| 4.40                                                                                                             | Who was the first woman you ever had any type of sex with?                                                                | <input type="radio"/> 01 = Girlfriend<br><input type="radio"/> 02 = Friend<br><input type="radio"/> 03 = Colleague<br><input type="radio"/> 04 = Family member<br><input type="radio"/> 05 = Stranger<br><input type="radio"/> 06 = Other<br><input type="radio"/> 88 = Refusal<br><input type="radio"/> 99 = Don't know<br><br>(specify): _____ |
| Now I will ask you some questions about your experiences in the last 12 months with your female sexual partners. |                                                                                                                           |                                                                                                                                                                                                                                                                                                                                                  |
| 4.43                                                                                                             | Thinking of the times you have had vaginal or anal sex with a woman, was there a time when a condom slipped off or broke? | <input type="radio"/> 01 = No<br><input type="radio"/> 02 = Yes, In the last month<br><input type="radio"/> 03 = Yes, in the last 12 months<br><input type="radio"/> 04 = Yes, but not in the last 12 months<br><input type="radio"/> 88 = Refusal<br><input type="radio"/> 99 = Don't know                                                      |
|                                                                                                                  | 4.44 When you have used a condom during vaginal or anal sex with a woman, how often has the condom slipped off or broken? | <input type="radio"/> 01 = Never<br><input type="radio"/> 02 = Almost never<br><input type="radio"/> 03 = About half the time<br><input type="radio"/> 04 = Almost always<br><input type="radio"/> 05 = Always<br><input type="radio"/> 88 = Refusal<br><input type="radio"/> 99 = Don't know                                                    |

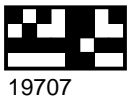

# TRUST QUESTIONNAIRE

## VISIT 0

### Module 4 - RISK BEHAVIOR - A. FEMALE PARTNERS

| No.  | Question                                                                                                                                                                                                                                                                                                                                                                                                   | Coded Responses (Shade in the appropriate circles)                                                                                                                                                                                                                                                                                                                                                                                 |
|------|------------------------------------------------------------------------------------------------------------------------------------------------------------------------------------------------------------------------------------------------------------------------------------------------------------------------------------------------------------------------------------------------------------|------------------------------------------------------------------------------------------------------------------------------------------------------------------------------------------------------------------------------------------------------------------------------------------------------------------------------------------------------------------------------------------------------------------------------------|
| 4.45 | In the last 12 months, how many women did you have oral sex with?                                                                                                                                                                                                                                                                                                                                          | <p><i>[Record the number of women. If 000 skip to 4.47]</i></p> <p>888 = Refusal [skip to 4.47] <input type="text" value=""/><input type="text" value=""/><input type="text" value=""/></p> <p>999 = Don't know [skip to 4.47]</p>                                                                                                                                                                                                 |
|      | 4.46 Of the times you had oral sex with a woman in the last 12 months, how often was a condom used?                                                                                                                                                                                                                                                                                                        | <p><input type="radio"/> 01 = Never <span style="margin-left: 200px;"><input type="radio"/> 05 = Always</span></p> <p><input type="radio"/> 02 = Almost never <span style="margin-left: 150px;"><input type="radio"/> 88 = Refusal</span></p> <p><input type="radio"/> 03 = About half the time <span style="margin-left: 100px;"><input type="radio"/> 99 = Don't know</span></p> <p><input type="radio"/> 04 = Almost always</p> |
| 4.47 | In the last 12 months, how many women did you have vaginal sex with?                                                                                                                                                                                                                                                                                                                                       | <p><i>[Record the number of women. If 000 skip to 4.50]</i></p> <p>888 = Refusal [skip to 4.50] <input type="text" value=""/><input type="text" value=""/><input type="text" value=""/></p> <p>999 = Don't know [skip to 4.50]</p>                                                                                                                                                                                                 |
|      | 4.48 Of the times you had vaginal sex with a woman in the last 12 months, how often was a condom used?                                                                                                                                                                                                                                                                                                     | <p><input type="radio"/> 01 = Never <span style="margin-left: 200px;"><input type="radio"/> 05 = Always</span></p> <p><input type="radio"/> 02 = Almost never <span style="margin-left: 150px;"><input type="radio"/> 88 = Refusal</span></p> <p><input type="radio"/> 03 = About half the time <span style="margin-left: 100px;"><input type="radio"/> 99 = Don't know</span></p> <p><input type="radio"/> 04 = Almost always</p> |
| 4.50 | In the last 12 months, how many women did you have anal sex with?                                                                                                                                                                                                                                                                                                                                          | <p><i>[Record the number of women. If 000 skip to 4.53]</i></p> <p>888 = Refusal [skip to 4.53] <input type="text" value=""/><input type="text" value=""/><input type="text" value=""/></p> <p>999 = Don't know [skip to 4.53]</p>                                                                                                                                                                                                 |
|      | 4.51 Of the times you had anal sex with a woman in the last 12 months, how often was a condom used?                                                                                                                                                                                                                                                                                                        | <p><input type="radio"/> 01 = Never <span style="margin-left: 200px;"><input type="radio"/> 05 = Always</span></p> <p><input type="radio"/> 02 = Almost never <span style="margin-left: 150px;"><input type="radio"/> 88 = Refusal</span></p> <p><input type="radio"/> 03 = About half the time <span style="margin-left: 100px;"><input type="radio"/> 99 = Don't know</span></p> <p><input type="radio"/> 04 = Almost always</p> |
| 4.53 | <p>Of the women you've had anal or vaginal sex with in the last 12 months, how many of them were main partners?</p> <p><i>By main partner, I mean a woman that you have sex with and with whom you feel committed to. This is a partner that you would call your girlfriend, spouse, significant other, or life partner (You can list main female partners even if you listed main male partners).</i></p> | <p><i>[Record the number of women. If 000 skip to 4.59]</i></p> <p>888 = Refusal [skip to 4.59] <input type="text" value=""/><input type="text" value=""/><input type="text" value=""/></p> <p>999 = Don't know [skip to 4.59]</p>                                                                                                                                                                                                 |
|      | 4.54 In the last 12 months, have you talked with your main female sexual partner(s) about sexually transmitted infections and HIV?                                                                                                                                                                                                                                                                         | <p><input type="radio"/> 01 = No</p> <p><input type="radio"/> 02 = With some but not all main female partners</p> <p><input type="radio"/> 03 = Yes, with all main female partners (or with the only one)</p> <p><input type="radio"/> 88 = Refusal</p> <p><input type="radio"/> 99 = Don't know</p>                                                                                                                               |
|      | <p>4.55 In the last 12 months, have you talked with your main female sexual partner(s) about their HIV status?</p> <p><i>(By this, I mean you ask or they tell you they have been tested and tell you the results, regardless of whether positive or negative)?</i></p>                                                                                                                                    | <p><input type="radio"/> 01 = No</p> <p><input type="radio"/> 02 = With some but not all main female partners</p> <p><input type="radio"/> 03 = Yes, with all main female partners (or with the only one)</p> <p><input type="radio"/> 88 = Refusal</p> <p><input type="radio"/> 99 = Don't know</p>                                                                                                                               |
|      | <p>4.56 In the last 12 months, have you talked with your main female sexual partner(s) about your HIV status?</p> <p><i>(By this, I mean they ask or you tell them you have been tested and tell them the results, regardless of whether positive or negative)</i></p>                                                                                                                                     | <p><input type="radio"/> 01 = No</p> <p><input type="radio"/> 02 = With some but not all main female partners</p> <p><input type="radio"/> 03 = Yes, with all main female partners (or with the only one)</p> <p><input type="radio"/> 88 = Refusal</p> <p><input type="radio"/> 99 = Don't know</p>                                                                                                                               |
|      | 4.57 Was a condom used the last time that you had vaginal or anal sex with a woman who you consider to be a main partner?                                                                                                                                                                                                                                                                                  | <p><input type="radio"/> 01 = No</p> <p><input type="radio"/> 02 = Yes</p> <p><input type="radio"/> 88 = Refusal</p> <p><input type="radio"/> 99 = Don't know</p>                                                                                                                                                                                                                                                                  |
|      | 4.58 How often are condoms used when you have vaginal or anal sex with women who you consider to be main partners?                                                                                                                                                                                                                                                                                         | <p><input type="radio"/> 01 = Never <span style="margin-left: 200px;"><input type="radio"/> 05 = Always</span></p> <p><input type="radio"/> 02 = Almost never <span style="margin-left: 150px;"><input type="radio"/> 88 = Refusal</span></p> <p><input type="radio"/> 03 = About half the time <span style="margin-left: 100px;"><input type="radio"/> 99 = Don't know</span></p> <p><input type="radio"/> 04 = Almost always</p> |

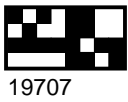

# TRUST QUESTIONNAIRE

## VISIT 0

### Module 4 - RISK BEHAVIOR - A. FEMALE PARTNERS

| No.  | Question                                                                                                                                                                                                                                                           | Coded Responses (Shade in the appropriate circles)                                                                                                                                                                                                                                                                                               |
|------|--------------------------------------------------------------------------------------------------------------------------------------------------------------------------------------------------------------------------------------------------------------------|--------------------------------------------------------------------------------------------------------------------------------------------------------------------------------------------------------------------------------------------------------------------------------------------------------------------------------------------------|
| 4.59 | <p>Of the women you've had vaginal or anal sex with in the last 12 months, how many of them were casual partners?</p> <p><i>By casual partner, this means a woman that you have sex with, but you don't know very well or don't feel committed to.</i></p>         | <p><i>[Record the number of women. If 000 skip to 4.65]</i></p> <p>888 = Refusal [skip to 4.65] <input type="text" value=""/><input type="text" value=""/><input type="text" value=""/></p> <p>999 = Don't know [skip to 4.65]</p>                                                                                                               |
|      | 4.60 In the last 12 months, have you talked with your casual female sexual partner(s) about sexually transmitted infections and HIV?                                                                                                                               | <input type="radio"/> 01 = No<br><input type="radio"/> 02 = With some but not all casual female partners<br><input type="radio"/> 03 = Yes, with all casual female partners (or with the only one)<br><input type="radio"/> 88 = Refusal<br><input type="radio"/> 99 = Don't know                                                                |
|      | 4.61 In the last 12 months, have you talked with your casual female sexual partner(s) about their HIV status?<br><br><i>(By this, I mean you ask or they tell you they have been tested and tell you the results, regardless of whether positive or negative)?</i> | <input type="radio"/> 01 = No<br><input type="radio"/> 02 = With some but not all casual female partners<br><input type="radio"/> 03 = Yes, with all casual female partners (or with the only one)<br><input type="radio"/> 88 = Refusal<br><input type="radio"/> 99 = Don't know                                                                |
|      | 4.62 In the last 12 months, have you talked with your casual female sexual partner(s) about your HIV status?<br><br><i>(By this, I mean they ask or you tell them you have been tested and tell them the results, regardless of whether positive or negative)</i>  | <input type="radio"/> 01 = No<br><input type="radio"/> 02 = With some but not all casual female partners<br><input type="radio"/> 03 = Yes, with all casual female partners (or with the only one)<br><input type="radio"/> 88 = Refusal<br><input type="radio"/> 99 = Don't know                                                                |
|      | 4.63 Was a condom used the last time that you had vaginal or anal sex with a woman who you consider to be a casual partner?                                                                                                                                        | <input type="radio"/> 01 = No<br><input type="radio"/> 02 = Yes<br><br><input type="radio"/> 88 = Refusal<br><input type="radio"/> 99 = Don't know                                                                                                                                                                                               |
|      | 4.64 How often are condoms used when you have vaginal or anal sex with women who are casual partners?                                                                                                                                                              | <input type="radio"/> 01 = Never<br><input type="radio"/> 02 = Almost never<br><input type="radio"/> 03 = About half the time<br><input type="radio"/> 04 = Almost always<br><input type="radio"/> 05 = Always<br><input type="radio"/> 88 = Refusal<br><input type="radio"/> 99 = Don't know                                                    |
| 4.65 | Thinking about when you had sex with any woman in the last 12 months, how many women did you have vaginal, anal or oral sex with in exchange for things you wanted or needed, such as money, drugs, food, shelter or transportation?                               | <p><i>[Record the number of women. If 000 skip to 4.66]</i></p> <p>888 = Refusal [skip to 4.66] <input type="text" value=""/><input type="text" value=""/><input type="text" value=""/></p> <p>999 = Don't know [skip to 4.66]</p>                                                                                                               |
|      | 4.65a Were you paid money?                                                                                                                                                                                                                                         | <input type="radio"/> 01 = No<br><input type="radio"/> 02 = Yes<br><br><input type="radio"/> 88 = Refusal<br><input type="radio"/> 99 = Don't know                                                                                                                                                                                               |
|      | 4.65b How would you classify the women who <u>gave you</u> money or things you needed for vaginal, anal or oral sex?                                                                                                                                               | <input type="radio"/> 01 = Girlfriend<br><input type="radio"/> 02 = Friend<br><input type="radio"/> 03 = Colleague<br><input type="radio"/> 04 = Family member<br><input type="radio"/> 05 = Stranger<br><input type="radio"/> 06 = Other<br><input type="radio"/> 88 = Refusal<br><input type="radio"/> 99 = Don't know<br><br>(specify): _____ |
| 4.66 | Thinking about when you had sex with any women in the last 12 months, how many women did you have vaginal, anal or oral sex with in exchange for things they wanted or needed like money, drugs, food, shelter or transportation?                                  | <p><i>[Record the number of women. If 000 skip to 4.67]</i></p> <p>888 = Refusal [skip to 4.67] <input type="text" value=""/><input type="text" value=""/><input type="text" value=""/></p> <p>999 = Don't know [skip to 4.67]</p>                                                                                                               |
|      | 4.66a Did you pay money?                                                                                                                                                                                                                                           | <input type="radio"/> 01 = No<br><input type="radio"/> 02 = Yes<br><br><input type="radio"/> 88 = Refusal<br><input type="radio"/> 99 = Don't know                                                                                                                                                                                               |

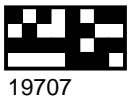

19707

## TRUST QUESTIONNAIRE

VISIT 0

## Module 4 - RISK BEHAVIOR - A. FEMALE PARTNERS

| No.                                                                                     | Question                                                                                                                                                                                                                                                                     | Coded Responses (Shade in the appropriate circles)                                                                                                                                                                                                                                                                                                                                                                                                            |
|-----------------------------------------------------------------------------------------|------------------------------------------------------------------------------------------------------------------------------------------------------------------------------------------------------------------------------------------------------------------------------|---------------------------------------------------------------------------------------------------------------------------------------------------------------------------------------------------------------------------------------------------------------------------------------------------------------------------------------------------------------------------------------------------------------------------------------------------------------|
|                                                                                         | <p><b>4.66b</b> How would you classify the women who <u>you gave</u> money or things they needed for vaginal, anal or oral sex?</p>                                                                                                                                          | <p> <input type="radio"/> 01 = Girlfriend                      <input type="radio"/> 05 = Stranger<br/> <input type="radio"/> 02 = Friend                              <input type="radio"/> 06 = Other<br/> <input type="radio"/> 03 = Colleague                          <input type="radio"/> 88 = Refusal<br/> <input type="radio"/> 04 = Family member                      <input type="radio"/> 99 = Don't know </p> <p>(If other, specify): _____</p> |
| <p>Now I want to ask you about your sexual experiences with women in the last month</p> |                                                                                                                                                                                                                                                                              |                                                                                                                                                                                                                                                                                                                                                                                                                                                               |
| 4.67                                                                                    | <p>In the last month, approximately how many women did you have any type of sex with?</p>                                                                                                                                                                                    | <p><i>[Record the number of female partners]</i></p> <p>88 = Refusal                                      <input type="text"/><input type="text"/><br/> 99 = Don't know</p>                                                                                                                                                                                                                                                                                   |
| 4.68                                                                                    | <p>In the last month, approximately how many women did you have vaginal sex with?</p>                                                                                                                                                                                        | <p><i>[Record the number of female partners. If 00, skip to 4.70]</i></p> <p>88 = Refusal                                      <input type="text"/><input type="text"/><br/> 99 = Don't know</p>                                                                                                                                                                                                                                                              |
|                                                                                         | <p><b>4.69</b> In the last month, how often were condoms used when you had vaginal sex with female partners?</p>                                                                                                                                                             | <p> <input type="radio"/> 01 = Never                                      <input type="radio"/> 05 = Always<br/> <input type="radio"/> 02 = Almost never                              <input type="radio"/> 88 = Refusal<br/> <input type="radio"/> 03 = About half the time                      <input type="radio"/> 99 = Don't know<br/> <input type="radio"/> 04 = Almost always </p>                                                                    |
| 4.70                                                                                    | <p>In the last month, approximately how many women did you have anal sex with?</p>                                                                                                                                                                                           | <p><i>[Record the number of female partners. If 00, skip to 4.72]</i></p> <p>88 = Refusal                                      <input type="text"/><input type="text"/><br/> 99 = Don't know</p>                                                                                                                                                                                                                                                              |
|                                                                                         | <p><b>4.71</b> In the last month, how often were condoms used when you had anal sex with female partners?</p>                                                                                                                                                                | <p> <input type="radio"/> 01 = Never                                      <input type="radio"/> 05 = Always<br/> <input type="radio"/> 02 = Almost never                              <input type="radio"/> 88 = Refusal<br/> <input type="radio"/> 03 = About half the time                      <input type="radio"/> 99 = Don't know<br/> <input type="radio"/> 04 = Almost always </p>                                                                    |
| 4.72                                                                                    | <p>Now think about the last time you had vaginal or anal sex with a female partner. Was a condom used at that time?</p>                                                                                                                                                      | <p> <input type="radio"/> 01 = No<br/> <input type="radio"/> 02 = Yes<br/> <br/> <input type="radio"/> 88 = Refusal<br/> <input type="radio"/> 99 = Don't know </p>                                                                                                                                                                                                                                                                                           |
| 4.73                                                                                    | <p>Now think about the last time a condom was not used with a female partner during vaginal or anal sex. Why wasn't a condom used at that time? I will read some possible reasons, and for each one please tell me whether that reason applies to your situation or not.</p> |                                                                                                                                                                                                                                                                                                                                                                                                                                                               |
|                                                                                         | <p><b>4.73b</b> = We forgot or didn't think about it</p>                                                                                                                                                                                                                     | <p> <input type="radio"/> 01 = No<br/> <input type="radio"/> 02 = Yes<br/> <br/> <input type="radio"/> 88 = Refusal<br/> <input type="radio"/> 99 = Don't know </p>                                                                                                                                                                                                                                                                                           |
|                                                                                         | <p><b>4.73c</b> = There were no condoms available</p>                                                                                                                                                                                                                        | <p> <input type="radio"/> 01 = No<br/> <input type="radio"/> 02 = Yes<br/> <br/> <input type="radio"/> 88 = Refusal<br/> <input type="radio"/> 99 = Don't know </p>                                                                                                                                                                                                                                                                                           |
|                                                                                         | <p><b>4.73d</b> = There was no time to find a condom</p>                                                                                                                                                                                                                     | <p> <input type="radio"/> 01 = No<br/> <input type="radio"/> 02 = Yes<br/> <br/> <input type="radio"/> 88 = Refusal<br/> <input type="radio"/> 99 = Don't know </p>                                                                                                                                                                                                                                                                                           |
|                                                                                         | <p><b>4.73e</b> = I don't like using condoms</p>                                                                                                                                                                                                                             | <p> <input type="radio"/> 01 = No<br/> <input type="radio"/> 02 = Yes<br/> <br/> <input type="radio"/> 88 = Refusal<br/> <input type="radio"/> 99 = Don't know </p>                                                                                                                                                                                                                                                                                           |
|                                                                                         | <p><b>4.73g</b> = I do not feel comfortable buying condoms</p>                                                                                                                                                                                                               | <p> <input type="radio"/> 01 = No<br/> <input type="radio"/> 02 = Yes<br/> <br/> <input type="radio"/> 88 = Refusal<br/> <input type="radio"/> 99 = Don't know </p>                                                                                                                                                                                                                                                                                           |

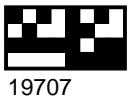

19707

# TRUST QUESTIONNAIRE

## Module 4 - RISK BEHAVIOR - A. FEMALE PARTNERS

VISIT 0

| No.         | Question                                                                                                                                                                                                                                                                                                                           | Coded Responses (Shade in the appropriate circles)                                                                                                                  |
|-------------|------------------------------------------------------------------------------------------------------------------------------------------------------------------------------------------------------------------------------------------------------------------------------------------------------------------------------------|---------------------------------------------------------------------------------------------------------------------------------------------------------------------|
|             | 4.73h = Condoms are not necessary                                                                                                                                                                                                                                                                                                  | <input type="radio"/> 01 = No<br><input type="radio"/> 02 = Yes<br><br><input type="radio"/> 88 = Refusal<br><input type="radio"/> 99 = Don't know                  |
|             | 4.73i = I don't trust condoms                                                                                                                                                                                                                                                                                                      | <input type="radio"/> 01 = No<br><input type="radio"/> 02 = Yes<br><br><input type="radio"/> 88 = Refusal<br><input type="radio"/> 99 = Don't know                  |
|             | 4.73j = I used another method to prevent HIV or sexually transmitted infection                                                                                                                                                                                                                                                     | <input type="radio"/> 01 = No<br><input type="radio"/> 02 = Yes<br><br><input type="radio"/> 88 = Refusal<br><input type="radio"/> 99 = Don't know                  |
|             | 4.73k = If I used a condom, my partner would think I have an infection                                                                                                                                                                                                                                                             | <input type="radio"/> 01 = No<br><input type="radio"/> 02 = Yes<br><br><input type="radio"/> 88 = Refusal<br><input type="radio"/> 99 = Don't know                  |
|             | 4.73l = My partner doesn't like them or objected                                                                                                                                                                                                                                                                                   | <input type="radio"/> 01 = No<br><input type="radio"/> 02 = Yes<br><br><input type="radio"/> 88 = Refusal<br><input type="radio"/> 99 = Don't know                  |
|             | 4.73m = My partner is/was a safe partner                                                                                                                                                                                                                                                                                           | <input type="radio"/> 01 = No<br><input type="radio"/> 02 = Yes<br><br><input type="radio"/> 88 = Refusal<br><input type="radio"/> 99 = Don't know                  |
|             | 4.73r = I was trying to get my partner pregnant                                                                                                                                                                                                                                                                                    | <input type="radio"/> 01 = No<br><input type="radio"/> 02 = Yes<br><br><input type="radio"/> 88 = Refusal<br><input type="radio"/> 99 = Don't know                  |
|             | 4.73s = My partner used another birth control method                                                                                                                                                                                                                                                                               | <input type="radio"/> 01 = No<br><input type="radio"/> 02 = Yes<br><br><input type="radio"/> 88 = Refusal<br><input type="radio"/> 99 = Don't know                  |
|             | 4.73t = Other (specify)                                                                                                                                                                                                                                                                                                            | <input type="radio"/> 01 = No<br><input type="radio"/> 02 = Yes (specify): _____<br><br><input type="radio"/> 88 = Refusal<br><input type="radio"/> 99 = Don't know |
| <b>4.74</b> | In the last 12 months, was there any time when you had two regular sexual partners at the same time; that is, two ongoing sexual partnerships, either with males or females? I will read possible types of ongoing sexual partnerships. For each one, please tell me if you had this combination of partners in the last 6 months. |                                                                                                                                                                     |
|             | 4.74a = Male and female partners                                                                                                                                                                                                                                                                                                   | <input type="radio"/> 01 = No<br><input type="radio"/> 02 = Yes<br><br><input type="radio"/> 88 = Refusal<br><input type="radio"/> 99 = Don't know                  |
|             | 4.74b = Two or more male partners                                                                                                                                                                                                                                                                                                  | <input type="radio"/> 01 = No<br><input type="radio"/> 02 = Yes<br><br><input type="radio"/> 88 = Refusal<br><input type="radio"/> 99 = Don't know                  |
|             | 4.74c = Two or more female partners                                                                                                                                                                                                                                                                                                | <input type="radio"/> 01 = No<br><input type="radio"/> 02 = Yes<br><br><input type="radio"/> 88 = Refusal<br><input type="radio"/> 99 = Don't know                  |

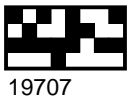

# TRUST QUESTIONNAIRE

VISIT 0

19707

## Module 5 - DEPRESSION

| No.  | Question                                                                                                                                                                                                                                                                                    | Coded Responses (Shade in the appropriate circles)                                                                                                 |
|------|---------------------------------------------------------------------------------------------------------------------------------------------------------------------------------------------------------------------------------------------------------------------------------------------|----------------------------------------------------------------------------------------------------------------------------------------------------|
|      | 4.74d = No concurrent partnerships in last 12 months                                                                                                                                                                                                                                        | <input type="radio"/> 01 = No<br><input type="radio"/> 02 = Yes<br><br><input type="radio"/> 88 = Refusal<br><input type="radio"/> 99 = Don't know |
| 4.75 | Do you currently have two or more regular sexual partners; that is, two or more ongoing sexual partnerships, either with males or females? I will read possible types of ongoing sexual partnerships. For each one, please tell me whether you currently have this combination of partners. |                                                                                                                                                    |
|      | 4.75a = Male and female partners                                                                                                                                                                                                                                                            | <input type="radio"/> 01 = No<br><input type="radio"/> 02 = Yes<br><br><input type="radio"/> 88 = Refusal<br><input type="radio"/> 99 = Don't know |
|      | 4.75b = Two or more male partners                                                                                                                                                                                                                                                           | <input type="radio"/> 01 = No<br><input type="radio"/> 02 = Yes<br><br><input type="radio"/> 88 = Refusal<br><input type="radio"/> 99 = Don't know |
|      | 4.75c = Two or more female partners                                                                                                                                                                                                                                                         | <input type="radio"/> 01 = No<br><input type="radio"/> 02 = Yes<br><br><input type="radio"/> 88 = Refusal<br><input type="radio"/> 99 = Don't know |
|      | 4.75d = No concurrent partnerships in last 12 months                                                                                                                                                                                                                                        | <input type="radio"/> 01 = No<br><input type="radio"/> 02 = Yes<br><br><input type="radio"/> 88 = Refusal<br><input type="radio"/> 99 = Don't know |
| 4.76 | As far as you know, does/do your current partner(s) currently have ongoing sexual partnerships with other male or female partners?                                                                                                                                                          | <input type="radio"/> 01 = No<br><input type="radio"/> 02 = Yes<br><br><input type="radio"/> 88 = Refusal<br><input type="radio"/> 99 = Don't know |

## Module 5 - Depression

"Now we are going to ask questions about your feelings of sadness or depression. Over the last 2 weeks, how often have you been bothered by any of the following problems? Please do not feel bad about answering as we will not tell anyone about what you tell us."

| No. | Question                                                             | Coded Responses (Shade in the appropriate circles)                                                                                                                                                                                                          |
|-----|----------------------------------------------------------------------|-------------------------------------------------------------------------------------------------------------------------------------------------------------------------------------------------------------------------------------------------------------|
|     | 5.07 Little interest or pleasure in doing things?                    | <input type="radio"/> 00 = Not at all <input type="radio"/> 03 = Nearly every day<br><input type="radio"/> 01 = Several days <input type="radio"/> 88 = Refusal<br><input type="radio"/> 02 = More than half the days <input type="radio"/> 99 = Don't know |
|     | 5.08 Feeling down, depressed (sad), or hopeless?                     | <input type="radio"/> 00 = Not at all <input type="radio"/> 03 = Nearly every day<br><input type="radio"/> 01 = Several days <input type="radio"/> 88 = Refusal<br><input type="radio"/> 02 = More than half the days <input type="radio"/> 99 = Don't know |
|     | 5.09 Either trouble falling or staying asleep, OR sleeping too much? | <input type="radio"/> 00 = Not at all <input type="radio"/> 03 = Nearly every day<br><input type="radio"/> 01 = Several days <input type="radio"/> 88 = Refusal<br><input type="radio"/> 02 = More than half the days <input type="radio"/> 99 = Don't know |
|     | 5.10 Feeling tired or having little energy?                          | <input type="radio"/> 00 = Not at all <input type="radio"/> 03 = Nearly every day<br><input type="radio"/> 01 = Several days <input type="radio"/> 88 = Refusal<br><input type="radio"/> 02 = More than half the days <input type="radio"/> 99 = Don't know |
|     | 5.11 Either poor appetite OR overeating                              | <input type="radio"/> 00 = Not at all <input type="radio"/> 03 = Nearly every day<br><input type="radio"/> 01 = Several days <input type="radio"/> 88 = Refusal<br><input type="radio"/> 02 = More than half the days <input type="radio"/> 99 = Don't know |



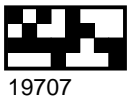

# TRUST QUESTIONNAIRE

## Module 5 - DEPRESSION

VISIT 0

19707

| No.  | Question                                                                                                                                                         | Coded Responses (Shade in the appropriate circles)                                                                                                                                                                                                          |
|------|------------------------------------------------------------------------------------------------------------------------------------------------------------------|-------------------------------------------------------------------------------------------------------------------------------------------------------------------------------------------------------------------------------------------------------------|
| 5.12 | Feeling bad about yourself- or that you are a failure or have let yourself or your family down?                                                                  | <input type="radio"/> 00 = Not at all <input type="radio"/> 03 = Nearly every day<br><input type="radio"/> 01 = Several days <input type="radio"/> 88 = Refusal<br><input type="radio"/> 02 = More than half the days <input type="radio"/> 99 = Don't know |
| 5.13 | Trouble concentrating on things, such as reading the newspaper or watching TV?                                                                                   | <input type="radio"/> 00 = Not at all <input type="radio"/> 03 = Nearly every day<br><input type="radio"/> 01 = Several days <input type="radio"/> 88 = Refusal<br><input type="radio"/> 02 = More than half the days <input type="radio"/> 99 = Don't know |
| 5.14 | Either moving or speaking so slowly that other people could have noticed OR being so fidgety or restless that you have been moving around a lot more than usual? | <input type="radio"/> 00 = Not at all <input type="radio"/> 03 = Nearly every day<br><input type="radio"/> 01 = Several days <input type="radio"/> 88 = Refusal<br><input type="radio"/> 02 = More than half the days <input type="radio"/> 99 = Don't know |
| 5.15 | Thought that you would be better off dead, or hurting yourself in some way?                                                                                      | <input type="radio"/> 00 = Not at all <input type="radio"/> 03 = Nearly every day<br><input type="radio"/> 01 = Several days <input type="radio"/> 88 = Refusal<br><input type="radio"/> 02 = More than half the days <input type="radio"/> 99 = Don't know |

## Module 6 - Knowledge, Attitudes, Behavior

"Now we are going to ask you private questions about HIV prevention and sexual practices. Please do not feel bad about answering as it will remain confidential"

| No.   | Question                                                                                                                                                                                                                                                                                                                                                     | Coded Responses (Shade in the appropriate circles)                                                                                                 |
|-------|--------------------------------------------------------------------------------------------------------------------------------------------------------------------------------------------------------------------------------------------------------------------------------------------------------------------------------------------------------------|----------------------------------------------------------------------------------------------------------------------------------------------------|
| 6.01  | In the last 12 months, have you been tested for a sexually transmitted infection (this could include syphilis, gonorrhea, Chlamydia, herpes or other infection)?                                                                                                                                                                                             | <input type="radio"/> 01 = No<br><input type="radio"/> 02 = Yes<br><br><input type="radio"/> 88 = Refusal<br><input type="radio"/> 99 = Don't know |
| 6.02  | In the last 12 months, have you been told by a doctor or other healthcare provider that you have a sexually transmitted infection (such as syphilis, gonorrhea or chlamydia, or herpes)? I will read a list of possible infections. For each one please tell me if you have been told by a doctor or other healthcare provider that you have this infection. |                                                                                                                                                    |
| 6.02a | = Syphilis                                                                                                                                                                                                                                                                                                                                                   | <input type="radio"/> 01 = No<br><input type="radio"/> 02 = Yes<br><br><input type="radio"/> 88 = Refusal<br><input type="radio"/> 99 = Don't know |
| 6.02b | = Gonorrhea                                                                                                                                                                                                                                                                                                                                                  | <input type="radio"/> 01 = No<br><input type="radio"/> 02 = Yes<br><br><input type="radio"/> 88 = Refusal<br><input type="radio"/> 99 = Don't know |
| 6.02c | = Chlamydia                                                                                                                                                                                                                                                                                                                                                  | <input type="radio"/> 01 = No<br><input type="radio"/> 02 = Yes<br><br><input type="radio"/> 88 = Refusal<br><input type="radio"/> 99 = Don't know |
| 6.02d | = Herpes                                                                                                                                                                                                                                                                                                                                                     | <input type="radio"/> 01 = No<br><input type="radio"/> 02 = Yes<br><br><input type="radio"/> 88 = Refusal<br><input type="radio"/> 99 = Don't know |
| 6.02e | = Human Papillomavirus (HPV)                                                                                                                                                                                                                                                                                                                                 | <input type="radio"/> 01 = No<br><input type="radio"/> 02 = Yes<br><br><input type="radio"/> 88 = Refusal<br><input type="radio"/> 99 = Don't know |
| 6.02f | = Hepatitis B                                                                                                                                                                                                                                                                                                                                                | <input type="radio"/> 01 = No<br><input type="radio"/> 02 = Yes<br><br><input type="radio"/> 88 = Refusal<br><input type="radio"/> 99 = Don't know |

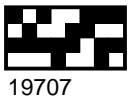

19707

# TRUST QUESTIONNAIRE

## Module 6 - Knowledge, Attitudes, Behavior

VISIT 0

| No.                                | Question                                                                                                                                                                                               | Coded Responses (Shade in the appropriate circles)                                                                                                                                                                                                                                                                                                                                                                                                                                                                                                                                                                                                                                                                                                                                                                                                                                                                                                                                                                                                                                                                                                                                                                                                                                                                                                                           |
|------------------------------------|--------------------------------------------------------------------------------------------------------------------------------------------------------------------------------------------------------|------------------------------------------------------------------------------------------------------------------------------------------------------------------------------------------------------------------------------------------------------------------------------------------------------------------------------------------------------------------------------------------------------------------------------------------------------------------------------------------------------------------------------------------------------------------------------------------------------------------------------------------------------------------------------------------------------------------------------------------------------------------------------------------------------------------------------------------------------------------------------------------------------------------------------------------------------------------------------------------------------------------------------------------------------------------------------------------------------------------------------------------------------------------------------------------------------------------------------------------------------------------------------------------------------------------------------------------------------------------------------|
|                                    | 6.02g = Hepatitis C                                                                                                                                                                                    | <input type="radio"/> 01 = No<br><input type="radio"/> 02 = Yes<br><br><input type="radio"/> 88 = Refusal<br><input type="radio"/> 99 = Don't know                                                                                                                                                                                                                                                                                                                                                                                                                                                                                                                                                                                                                                                                                                                                                                                                                                                                                                                                                                                                                                                                                                                                                                                                                           |
|                                    | 6.02h = Other (specify)                                                                                                                                                                                | <input type="radio"/> 01 = No<br><input type="radio"/> 02 = Yes (specify): _____<br><br><input type="radio"/> 88 = Refusal<br><input type="radio"/> 99 = Don't know                                                                                                                                                                                                                                                                                                                                                                                                                                                                                                                                                                                                                                                                                                                                                                                                                                                                                                                                                                                                                                                                                                                                                                                                          |
|                                    | 6.03 Have you ever received a vaccine to prevent getting Hepatitis B infection?                                                                                                                        | <input type="radio"/> 01 = No<br><input type="radio"/> 02 = Yes<br><br><input type="radio"/> 88 = Refusal<br><input type="radio"/> 99 = Don't know                                                                                                                                                                                                                                                                                                                                                                                                                                                                                                                                                                                                                                                                                                                                                                                                                                                                                                                                                                                                                                                                                                                                                                                                                           |
| 6.04                               | In the last 12 months, have you had symptoms of a sexually transmitted infection including discharge from your penis or sores on or around your penis or anus?                                         | <input type="radio"/> 01 = No [skip to 6.07]<br><input type="radio"/> 02 = Yes<br><br><input type="radio"/> 88 = Refusal [skip to 6.07]<br><input type="radio"/> 99 = Don't know [skip to 6.07]                                                                                                                                                                                                                                                                                                                                                                                                                                                                                                                                                                                                                                                                                                                                                                                                                                                                                                                                                                                                                                                                                                                                                                              |
|                                    | 6.05 Was this infection treated by a doctor or other healthcare provider?                                                                                                                              | <input type="radio"/> 01 = No, no treatment at all<br><input type="radio"/> 02 = Yes, treated by a healthcare provider<br><input type="radio"/> 03 = No, self-treated<br><input type="radio"/> 04 = No, treated by a traditional healer<br><input type="radio"/> 05 = No, treated by another (specify): _____<br><br><input type="radio"/> 88 = Refusal<br><input type="radio"/> 99 = Don't know                                                                                                                                                                                                                                                                                                                                                                                                                                                                                                                                                                                                                                                                                                                                                                                                                                                                                                                                                                             |
|                                    | 6.06 When you have had these symptoms from your penis or sores on or around your penis or anus, have you ever avoided seeking care because you are worried others will find out you have sex with men? | <input type="radio"/> 01 = No<br><input type="radio"/> 02 = Yes<br><br><input type="radio"/> 88 = Refusal<br><input type="radio"/> 99 = Don't know                                                                                                                                                                                                                                                                                                                                                                                                                                                                                                                                                                                                                                                                                                                                                                                                                                                                                                                                                                                                                                                                                                                                                                                                                           |
| Now let's talk about HIV infection |                                                                                                                                                                                                        |                                                                                                                                                                                                                                                                                                                                                                                                                                                                                                                                                                                                                                                                                                                                                                                                                                                                                                                                                                                                                                                                                                                                                                                                                                                                                                                                                                              |
| 6.07                               | Have any of your family members who lived in your household been told by a doctor that they have HIV?                                                                                                  | <input type="radio"/> 01 = No [skip to 6.09]<br><input type="radio"/> 02 = Yes<br><br><input type="radio"/> 88 = Refusal [skip to 6.09]<br><input type="radio"/> 99 = Don't know [skip to 6.09]                                                                                                                                                                                                                                                                                                                                                                                                                                                                                                                                                                                                                                                                                                                                                                                                                                                                                                                                                                                                                                                                                                                                                                              |
| 6.09                               | Have ever been tested for HIV infection?                                                                                                                                                               | <input type="radio"/> 01 = No [skip to 6.23]<br><input type="radio"/> 02 = Yes, once<br><input type="radio"/> 03 = Yes, more than once<br><br><input type="radio"/> 88 = Refusal [skip to 6.23]<br><input type="radio"/> 99 = Don't know [skip to 6.23]                                                                                                                                                                                                                                                                                                                                                                                                                                                                                                                                                                                                                                                                                                                                                                                                                                                                                                                                                                                                                                                                                                                      |
|                                    | 6.09a Date when last tested for HIV?                                                                                                                                                                   | 88/8888 = Refusal<br>99/9999 = Don't Know<br><div style="display: flex; justify-content: space-around; align-items: center;"> <div style="border: 1px solid black; width: 30px; height: 20px; display: flex; align-items: center; justify-content: center;"> <span style="font-size: 8px;"> </span> </div> <div style="border: 1px solid black; width: 30px; height: 20px; display: flex; align-items: center; justify-content: center;"> <span style="font-size: 8px;"> </span> </div> <div style="text-align: center; font-size: 8px;">Month</div> <div style="width: 20px;"></div> <div style="border: 1px solid black; width: 40px; height: 20px; display: flex; align-items: center; justify-content: center;"> <span style="font-size: 8px;"> </span> </div> <div style="border: 1px solid black; width: 40px; height: 20px; display: flex; align-items: center; justify-content: center;"> <span style="font-size: 8px;"> </span> </div> <div style="border: 1px solid black; width: 40px; height: 20px; display: flex; align-items: center; justify-content: center;"> <span style="font-size: 8px;"> </span> </div> <div style="border: 1px solid black; width: 40px; height: 20px; display: flex; align-items: center; justify-content: center;"> <span style="font-size: 8px;"> </span> </div> <div style="text-align: center; font-size: 8px;">Year</div> </div> |
|                                    | 6.10 Did you receive the results of your HIV test?                                                                                                                                                     | <input type="radio"/> 01 = No [skip to 6.23]<br><input type="radio"/> 02 = Yes<br><br><input type="radio"/> 88 = Refusal [skip to 6.23]<br><input type="radio"/> 99 = Don't know [skip to 6.23]                                                                                                                                                                                                                                                                                                                                                                                                                                                                                                                                                                                                                                                                                                                                                                                                                                                                                                                                                                                                                                                                                                                                                                              |
|                                    | 6.11 Have you ever been told by a doctor or healthcare provider that you have HIV after being tested for HIV?                                                                                          | <input type="radio"/> 01 = No [skip to 6.23]<br><input type="radio"/> 02 = Yes<br><br><input type="radio"/> 88 = Refusal [skip to 6.23]<br><input type="radio"/> 99 = Don't know [skip to 6.23]                                                                                                                                                                                                                                                                                                                                                                                                                                                                                                                                                                                                                                                                                                                                                                                                                                                                                                                                                                                                                                                                                                                                                                              |
|                                    | 6.12 If you have children, has a doctor or healthcare provider told you that any of your children have HIV?                                                                                            | <input type="radio"/> 01 = No<br><input type="radio"/> 02 = Yes<br><input type="radio"/> 03 = Not applicable, no biological children<br><br><input type="radio"/> 88 = Refusal<br><input type="radio"/> 99 = Don't know                                                                                                                                                                                                                                                                                                                                                                                                                                                                                                                                                                                                                                                                                                                                                                                                                                                                                                                                                                                                                                                                                                                                                      |
|                                    | 6.13 Approximately how many years has it been since you were told by a healthcare provider that you have HIV?                                                                                          | <i>[Record the number of years]</i><br><br>88 = Refusal<br>99 = Don't know<br><br><div style="border: 1px solid black; width: 30px; height: 20px; display: flex; align-items: center; justify-content: center;"> <span style="font-size: 8px;"> </span> </div>                                                                                                                                                                                                                                                                                                                                                                                                                                                                                                                                                                                                                                                                                                                                                                                                                                                                                                                                                                                                                                                                                                               |

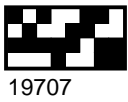

# TRUST QUESTIONNAIRE

## Module 6 - Knowledge, Attitudes, Behavior

VISIT 0

| No.  | Question                                                                                                                                         | Coded Responses (Shade in the appropriate circles)                                                                                                                                                                                                                                                                                                      |
|------|--------------------------------------------------------------------------------------------------------------------------------------------------|---------------------------------------------------------------------------------------------------------------------------------------------------------------------------------------------------------------------------------------------------------------------------------------------------------------------------------------------------------|
| 6.14 | Since the time that you were told that you have HIV, have you told any of these types of healthcare workers your HIV status?                     |                                                                                                                                                                                                                                                                                                                                                         |
|      | 6.14a = Doctors                                                                                                                                  | <input type="radio"/> 01 = No<br><input type="radio"/> 02 = Yes<br><br><input type="radio"/> 88 = Refusal<br><input type="radio"/> 99 = Don't know                                                                                                                                                                                                      |
|      | 6.14b = Nurses                                                                                                                                   | <input type="radio"/> 01 = No<br><input type="radio"/> 02 = Yes<br><br><input type="radio"/> 88 = Refusal<br><input type="radio"/> 99 = Don't know                                                                                                                                                                                                      |
|      | 6.14c = Midwives                                                                                                                                 | <input type="radio"/> 01 = No<br><input type="radio"/> 02 = Yes<br><br><input type="radio"/> 88 = Refusal<br><input type="radio"/> 99 = Don't know                                                                                                                                                                                                      |
|      | 6.14d = Counselors                                                                                                                               | <input type="radio"/> 01 = No<br><input type="radio"/> 02 = Yes<br><br><input type="radio"/> 88 = Refusal<br><input type="radio"/> 99 = Don't know                                                                                                                                                                                                      |
|      | 6.14e = Other (specify)                                                                                                                          | <input type="radio"/> 01 = No<br><input type="radio"/> 02 = Yes (specify): _____<br><br><input type="radio"/> 88 = Refusal<br><input type="radio"/> 99 = Don't know                                                                                                                                                                                     |
|      | 6.15 To determine when people should begin treatment for HIV, a test called CD4 is done. Have you been tested to learn what your CD4 levels are? | <input type="radio"/> 01 = No, and I am not scheduled to have my CD4 levels monitored [skip to 6.17]<br><input type="radio"/> 02 = No, but I am scheduled to have my CD4 levels monitored [skip to 6.17]<br><input type="radio"/> 03 = Yes<br><input type="radio"/> 88 = Refusal [skip to 6.17]<br><input type="radio"/> 99 = Don't know [skip to 6.17] |
|      | 6.16 Have you received the results of your last CD4 test?                                                                                        | <input type="radio"/> 01 = No<br><input type="radio"/> 02 = Yes<br><br><input type="radio"/> 88 = Refusal<br><input type="radio"/> 99 = Don't know                                                                                                                                                                                                      |
|      | 6.17 Have you been told by a physician or healthcare provider that you need to begin treatment for HIV?                                          | <input type="radio"/> 01 = No [skip to 6.21]<br><input type="radio"/> 02 = Yes<br><br><input type="radio"/> 88 = Refusal [skip to 6.21]<br><input type="radio"/> 99 = Don't know [skip to 6.21]                                                                                                                                                         |
|      | 6.18 Are you currently being treated for HIV?                                                                                                    | <input type="radio"/> 01 = No [skip to 6.21]<br><input type="radio"/> 02 = Yes<br><br><input type="radio"/> 88 = Refusal [skip to 6.21]<br><input type="radio"/> 99 = Don't know [skip to 6.21]                                                                                                                                                         |
|      | 6.19 What treatment are you currently receiving?                                                                                                 | <input type="radio"/> 01 = Medication from health facility or pharmacy<br><input type="radio"/> 02 = Traditional herbs<br><input type="radio"/> 03 = Other (specify): _____<br><input type="radio"/> 88 = Refusal<br><input type="radio"/> 99 = Don't know                                                                                              |
|      | 6.20 Has there been a time that you could not obtain all of the medications you need to treat your HIV infection?                                | <input type="radio"/> 01 = No<br><input type="radio"/> 02 = Yes<br><br><input type="radio"/> 88 = Refusal<br><input type="radio"/> 99 = Don't know                                                                                                                                                                                                      |

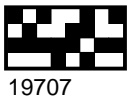

# TRUST QUESTIONNAIRE

## Module 6 - Knowledge, Attitudes, Behavior

VISIT 0

| No.  | Question                                                                                                                                                                                                                                                                                             | Coded Responses (Shade in the appropriate circles)                                                                                                                                                                                                                                                                                                                                                                                                             |  |  |
|------|------------------------------------------------------------------------------------------------------------------------------------------------------------------------------------------------------------------------------------------------------------------------------------------------------|----------------------------------------------------------------------------------------------------------------------------------------------------------------------------------------------------------------------------------------------------------------------------------------------------------------------------------------------------------------------------------------------------------------------------------------------------------------|--|--|
|      | 6.21 Have you told your male sexual partners that you are living with HIV?                                                                                                                                                                                                                           | <input type="radio"/> 01 = No, none<br><input type="radio"/> 02 = Some but not all male sexual partners<br><input type="radio"/> 03 = Yes, all male sexual partners<br><input type="radio"/> 88 = Refusal<br><input type="radio"/> 99 = Don't know                                                                                                                                                                                                             |  |  |
|      | 6.22 Have you told your female sexual partners that you are living with HIV?                                                                                                                                                                                                                         | <input type="radio"/> 01 = No, none<br><input type="radio"/> 02 = Some but not all female sexual partners<br><input type="radio"/> 03 = Yes, all female sexual partners<br><input type="radio"/> 88 = Refusal<br><input type="radio"/> 99 = Don't know                                                                                                                                                                                                         |  |  |
| 6.23 | Do you have access to condoms when you need them?<br><i>(By this I mean, are you able to buy them or obtain them for free somewhere?)</i>                                                                                                                                                            | <input type="radio"/> 01 = Very difficult access <input type="radio"/> 05 = Very easy access<br><input type="radio"/> 02 = Somewhat difficult access <input type="radio"/> 88 = Refusal<br><input type="radio"/> 03 = Neither difficult nor easy access <input type="radio"/> 99 = Don't know<br><input type="radio"/> 04 = Somewhat easy access                                                                                                               |  |  |
| 6.24 | In general, do you buy condoms or get them for free?                                                                                                                                                                                                                                                 | <input type="radio"/> 01 = Buy them [skip to 6.29] <input type="radio"/> 04 = Neither<br><input type="radio"/> 02 = Get them for free <input type="radio"/> 88 = Refusal [skip to 6.29]<br><input type="radio"/> 03 = Both <input type="radio"/> 99 = Don't know [skip to 6.29]                                                                                                                                                                                |  |  |
|      | 6.26 In the last week, approximately how many condoms did you receive for free?                                                                                                                                                                                                                      | <i>[Record the number of condoms]</i><br>88 = Refusal<br>99 = Don't know <table border="1" style="float: right; margin-left: 20px;"> <tr> <td style="width: 20px; height: 20px;"></td> <td style="width: 20px; height: 20px;"></td> </tr> </table>                                                                                                                                                                                                             |  |  |
|      |                                                                                                                                                                                                                                                                                                      |                                                                                                                                                                                                                                                                                                                                                                                                                                                                |  |  |
|      | 6.27 Was that quantity that you received for free sufficient?                                                                                                                                                                                                                                        | <input type="radio"/> 01 = No<br><input type="radio"/> 02 = Yes<br><br><input type="radio"/> 88 = Refusal<br><input type="radio"/> 99 = Don't know                                                                                                                                                                                                                                                                                                             |  |  |
| 6.29 | In general, when you use condoms, do you use lubricated condoms?                                                                                                                                                                                                                                     | <input type="radio"/> 01 = No<br><input type="radio"/> 02 = Yes<br><br><input type="radio"/> 88 = Refusal<br><input type="radio"/> 99 = Don't know                                                                                                                                                                                                                                                                                                             |  |  |
| 6.30 | Do you have access to lubricants when you need them?<br><i>(By this I mean, are you able to buy them or obtain them for free somewhere?)<br/>These could include petroleum jelly or Vaseline, body creams/fatty creams, water-based lubricant (ex. KY jelly or lubrica), saliva, or cooking oil.</i> | <input type="radio"/> 01 = Very difficult access <input type="radio"/> 05 = Very easy access<br><input type="radio"/> 02 = Somewhat difficult access <input type="radio"/> 88 = Refusal<br><input type="radio"/> 03 = Neither difficult nor easy access <input type="radio"/> 99 = Don't know<br><input type="radio"/> 04 = Somewhat easy access                                                                                                               |  |  |
|      | 6.31 Have you ever used lubricants during sex?<br><i>These could include petroleum jelly or Vaseline, body creams/fatty creams, water-based lubricant (ex. KY jelly or lubrica), saliva, or cooking oil.</i>                                                                                         | <input type="radio"/> 01 = No (skip to 6.36)<br><input type="radio"/> 02 = Yes, without condoms<br><input type="radio"/> 03 = Yes, with condoms<br><input type="radio"/> 04 = Yes, sometimes with and sometimes without condoms<br><input type="radio"/> 88 = Refusal (skip to 6.36)<br><input type="radio"/> 99 = Don't know (skip to 6.36)                                                                                                                   |  |  |
| 6.32 | Do you use lubricants with condoms for vaginal or anal sex with women?                                                                                                                                                                                                                               | <input type="radio"/> 01 = No<br><input type="radio"/> 02 = Yes<br><input type="radio"/> 03 = Not applicable - Do not have sex with women<br><input type="radio"/> 88 = Refusal<br><input type="radio"/> 99 = Don't know                                                                                                                                                                                                                                       |  |  |
|      | 6.33 Which type of lubricant do you most often use for vaginal or anal sex with women?                                                                                                                                                                                                               | <input type="radio"/> 01 = Petroleum jelly or Vaseline <input type="radio"/> 06 = No lubricant use<br><input type="radio"/> 02 = Body creams/fatty creams <input type="radio"/> 07 = Other<br><input type="radio"/> 03 = Water-based lubricant (ex: KY jelly or lubrica) <input type="radio"/> 88 = Refusal<br><input type="radio"/> 04 = Saliva <input type="radio"/> 99 = Don't know<br><input type="radio"/> 05 = Cooking oil<br>(If other, specify): _____ |  |  |

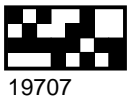

# TRUST QUESTIONNAIRE

## Module 6 - Knowledge, Attitudes, Behavior

VISIT 0

| No.                                                                                                                                                                                                         | Question                                                                                                                                                                                                                                                                                                                                                                                                                       | Coded Responses (Shade in the appropriate circles)                                                                                                                                                                                                                                                                                                                                                                                                                         |
|-------------------------------------------------------------------------------------------------------------------------------------------------------------------------------------------------------------|--------------------------------------------------------------------------------------------------------------------------------------------------------------------------------------------------------------------------------------------------------------------------------------------------------------------------------------------------------------------------------------------------------------------------------|----------------------------------------------------------------------------------------------------------------------------------------------------------------------------------------------------------------------------------------------------------------------------------------------------------------------------------------------------------------------------------------------------------------------------------------------------------------------------|
| 6.34                                                                                                                                                                                                        | Do you use lubricants with condoms for anal sex with men?                                                                                                                                                                                                                                                                                                                                                                      | <input type="radio"/> 01 = No<br><input type="radio"/> 02 = Yes<br><br><input type="radio"/> 88 = Refusal<br><input type="radio"/> 99 = Don't know                                                                                                                                                                                                                                                                                                                         |
| 6.35                                                                                                                                                                                                        | Which type of lubricant do you most often use for anal sex with men?                                                                                                                                                                                                                                                                                                                                                           | <input type="radio"/> 01 = Petroleum jelly or Vaseline<br><input type="radio"/> 02 = Body creams/fatty creams<br><input type="radio"/> 03 = Water-based lubricant (ex: KY jelly or lubrica)<br><input type="radio"/> 04 = Saliva<br><input type="radio"/> 05 = Cooking oil<br>(If other, specify): _____<br><input type="radio"/> 06 = No lubricant use<br><input type="radio"/> 07 = Other<br><input type="radio"/> 88 = Refusal<br><input type="radio"/> 99 = Don't know |
| 6.36                                                                                                                                                                                                        | In the last 12 months, how worried would you say you have been about HIV/AIDS infection?                                                                                                                                                                                                                                                                                                                                       | <input type="radio"/> 01 = Very worried<br><input type="radio"/> 02 = Somewhat worried<br><input type="radio"/> 03 = A little worried<br><input type="radio"/> 04 = Not at all worried<br><input type="radio"/> 88 = Refusal<br><input type="radio"/> 99 = Don't know                                                                                                                                                                                                      |
| <p>Now I would like to ask a few questions about drugs or substances that you may have used. Please remember, your responses are private, and we will not share what you have told us with anyone else.</p> |                                                                                                                                                                                                                                                                                                                                                                                                                                |                                                                                                                                                                                                                                                                                                                                                                                                                                                                            |
| 6.44                                                                                                                                                                                                        | Have you ever injected illegal drugs (ex: cocaine, heroin) or legal drugs for recreational purposes?<br><br><i>(By recreational purposes, I mean the drug was not prescribed as a medication or for health reasons but you injected it for pleasure, enjoyment, or a high)</i>                                                                                                                                                 | <input type="radio"/> 01 = No<br><input type="radio"/> 02 = Yes<br><br><input type="radio"/> 88 = Refusal<br><input type="radio"/> 99 = Don't know                                                                                                                                                                                                                                                                                                                         |
| 6.46                                                                                                                                                                                                        | When using a needle to inject something (for any reason), did you ever share your used needle(s) with another person?                                                                                                                                                                                                                                                                                                          | <input type="radio"/> 01 = No<br><input type="radio"/> 02 = Yes, in the last 12 months<br><input type="radio"/> 03 = Yes, but not in the last 12 months<br><input type="radio"/> 88 = Refusal<br><input type="radio"/> 99 = Don't know                                                                                                                                                                                                                                     |
| 6.47                                                                                                                                                                                                        | When using a needle to inject something (for any reason), did you ever use a needle that someone else had already used?                                                                                                                                                                                                                                                                                                        | <input type="radio"/> 01 = No<br><input type="radio"/> 02 = Yes, in the last 12 months<br><input type="radio"/> 03 = Yes, but not in the last 12 months<br><input type="radio"/> 88 = Refusal<br><input type="radio"/> 99 = Don't know                                                                                                                                                                                                                                     |
| 6.49                                                                                                                                                                                                        | Have you ever used any drug that you did not inject and that was not prescribed to you for health reasons?<br><br><i>(These can include marijuana, banga, glue, powdered cocaine, narcotics, codeine, or other drugs)</i>                                                                                                                                                                                                      | <input type="radio"/> 01 = No<br><input type="radio"/> 02 = Yes, in the last 12 months<br><input type="radio"/> 03 = Yes, but not in the last 12 months<br><input type="radio"/> 88 = Refusal<br><input type="radio"/> 99 = Don't know                                                                                                                                                                                                                                     |
|                                                                                                                                                                                                             | 6.49a Do you currently have sex while under the influence of drugs?                                                                                                                                                                                                                                                                                                                                                            | <input type="radio"/> 01 = No<br><input type="radio"/> 02 = Yes, in the last 12 months<br><input type="radio"/> 03 = Yes, but not in the last 12 months<br><input type="radio"/> 88 = Refusal<br><input type="radio"/> 99 = Don't know                                                                                                                                                                                                                                     |
|                                                                                                                                                                                                             | 6.49b Do you currently smoke cigarettes, cigars, or pipes?                                                                                                                                                                                                                                                                                                                                                                     | <input type="radio"/> 01 = No<br><input type="radio"/> 02 = Yes, in the last 12 months<br><input type="radio"/> 03 = Yes, but not in the last 12 months<br><input type="radio"/> 88 = Refusal<br><input type="radio"/> 99 = Don't know                                                                                                                                                                                                                                     |
| <p>Now I would like to ask a few questions about alcohol you may drink.</p>                                                                                                                                 |                                                                                                                                                                                                                                                                                                                                                                                                                                |                                                                                                                                                                                                                                                                                                                                                                                                                                                                            |
| 6.50                                                                                                                                                                                                        | In the last 30 days, how many days did you drink at least one drink of alcohol?                                                                                                                                                                                                                                                                                                                                                | <i>[Record the number of days. If 00 (no alcohol use), skip to 6.53]</i><br>88 = Refusal [skip to 6.53]<br>99 = Don't know [skip to 6.53] <table border="1" style="float: right; width: 40px; height: 20px; margin-left: 20px;"></table>                                                                                                                                                                                                                                   |
| 6.51                                                                                                                                                                                                        | During these days when you did drink alcohol, how many days would you say you drank 5 or more drinks in one sitting?<br><br>One drink is equal to:<br>- One 330ml glass, can or bottle of beer<br>- One 50 ml glass or cup of vodka<br>- One 100ml glass of wine<br><br><i>[Interviewer check: this response should not be greater than the response for 6.50. If it is, ask both questions again to ensure understanding]</i> | <i>[Record the number of days, including 00 if the individual did not drink 5 or more drinks in one sitting on any day in the last 30 days]</i><br>88 = Refusal<br>99 = Don't know <table border="1" style="float: right; width: 40px; height: 20px; margin-left: 20px;"></table>                                                                                                                                                                                          |

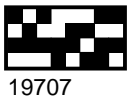

# TRUST QUESTIONNAIRE

## Module 6 - Knowledge, Attitudes, Behavior

VISIT 0

| No.                                                                     | Question                                                                                                                                                                                                                                              | Coded Responses (Shade in the appropriate circles)                                                                                                                                                                                                                                                                                                                                                                                                                          |
|-------------------------------------------------------------------------|-------------------------------------------------------------------------------------------------------------------------------------------------------------------------------------------------------------------------------------------------------|-----------------------------------------------------------------------------------------------------------------------------------------------------------------------------------------------------------------------------------------------------------------------------------------------------------------------------------------------------------------------------------------------------------------------------------------------------------------------------|
| 6.52                                                                    | Approximately how many drinks containing alcohol do you have on a typical day/night when you are drinking?<br><br>One drink is equal to<br>- One 330ml glass, can or bottle of beer<br>- One 50 ml glass or cup of vodka<br>- One 100ml glass of wine | <i>[Record the number of drinks. E.g. 04 for 4 drinks. If a respondent had consumed three bottles of beer each 330ml and one 100ml glass of wine, mark as 04.]</i><br><br><div style="border: 1px solid black; width: 40px; height: 20px; margin-left: auto; margin-right: auto;"></div><br>88 = Refusal<br>99 = Don't know                                                                                                                                                 |
|                                                                         | 6.52a Do you currently have sex while under the influence of alcohol?                                                                                                                                                                                 | <input type="radio"/> 01 = No<br><input type="radio"/> 02 = Yes, in the last 12 months<br><input type="radio"/> 03 = Yes, but not in the last 12 months<br><br><input type="radio"/> 88 = Refusal<br><input type="radio"/> 99 = Don't know                                                                                                                                                                                                                                  |
| Now I would like to ask a few questions about sexual practices and HIV. |                                                                                                                                                                                                                                                       |                                                                                                                                                                                                                                                                                                                                                                                                                                                                             |
| 6.53                                                                    | What type of sex puts you most at risk for HIV infection?                                                                                                                                                                                             | <input type="radio"/> 01 = Vaginal sex<br><input type="radio"/> 02 = Anal sex<br><input type="radio"/> 03 = Oral sex<br><br><input type="radio"/> 04 = All carry equal risk<br><input type="radio"/> 88 = Refusal<br><input type="radio"/> 99 = Don't know                                                                                                                                                                                                                  |
| 6.54                                                                    | Which type of anal sex position puts you most at risk for HIV infection?                                                                                                                                                                              | <input type="radio"/> 01 = Insertive (top)<br><input type="radio"/> 02 = Receptive (bottom)<br><input type="radio"/> 03 = Insertive and receptive anal sex carry equal risk<br><br><input type="radio"/> 88 = Refusal<br><input type="radio"/> 99 = Don't know                                                                                                                                                                                                              |
| 6.55                                                                    | Which is the safest lubricant to use during vaginal sex with a woman with latex condoms?                                                                                                                                                              | <input type="radio"/> 01 = Petroleum jelly or Vaseline<br><input type="radio"/> 02 = Body creams/fatty creams<br><input type="radio"/> 03 = Water-based lubricant (ex: KY jelly or lubrica)<br><input type="radio"/> 04 = Saliva<br><input type="radio"/> 05 = Cooking oil (If other, specify): _____<br><br><input type="radio"/> 06 = No lubricant use<br><input type="radio"/> 07 = Other<br><input type="radio"/> 88 = Refusal<br><input type="radio"/> 99 = Don't know |
| 6.56                                                                    | Which is the safest lubricant to use during anal sex with latex condoms?                                                                                                                                                                              | <input type="radio"/> 01 = Petroleum jelly or Vaseline<br><input type="radio"/> 02 = Body creams/fatty creams<br><input type="radio"/> 03 = Water-based lubricant (ex: KY jelly or lubrica)<br><input type="radio"/> 04 = Saliva<br><input type="radio"/> 05 = Cooking oil (If other, specify): _____<br><br><input type="radio"/> 06 = No lubricant use<br><input type="radio"/> 07 = Other<br><input type="radio"/> 88 = Refusal<br><input type="radio"/> 99 = Don't know |
| 6.57                                                                    | Can you get HIV from using a needle to inject a drug or substance after someone else has used the needle?                                                                                                                                             | <input type="radio"/> 01 = No<br><input type="radio"/> 02 = Yes<br><br><input type="radio"/> 88 = Refusal<br><input type="radio"/> 99 = Don't know                                                                                                                                                                                                                                                                                                                          |

*End of questionnaire*

*"Thank you for taking the time to sit with me. I know we have gone through many questions and I really appreciate your time and openness. We are finished with the long part of the study. Do you feel ready to proceed with clinical care?"*

*Escort participant to coupon manager*

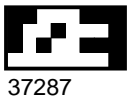

37287

# TRUST QUESTIONNAIRE

Module 7 - Risk in MSM Sexual Network

## VISIT 1

|                                                                                                                                                                                                                                                                                                                                                                                                                                                  |                                                                                                                                |                                                                 |
|--------------------------------------------------------------------------------------------------------------------------------------------------------------------------------------------------------------------------------------------------------------------------------------------------------------------------------------------------------------------------------------------------------------------------------------------------|--------------------------------------------------------------------------------------------------------------------------------|-----------------------------------------------------------------|
| Visit Date (dd/mm/yyyy) <input style="width: 20px; height: 20px; border: 1px solid black;" type="text"/> / <input style="width: 20px; height: 20px; border: 1px solid black;" type="text"/> / <input style="width: 20px; height: 20px; border: 1px solid black;" type="text"/> <input style="width: 20px; height: 20px; border: 1px solid black;" type="text"/> <input style="width: 20px; height: 20px; border: 1px solid black;" type="text"/> | Interviewer ID <input style="width: 20px; height: 20px; border: 1px solid black;" type="text"/>                                | Location: <input type="radio"/> TRUST <input type="radio"/> GRK |
| Study Number: <input style="width: 300px; height: 25px; border: 1px solid black;" type="text"/>                                                                                                                                                                                                                                                                                                                                                  | RDS Coupon Number used to recruit participant <input style="width: 60px; height: 20px; border: 1px solid black;" type="text"/> |                                                                 |

### MODULE 7 - Risk in MSM Sexual Network

The next set of questions will ask you more details about the men with whom you have had anal or oral sex with in the past year.

| No.  | Question                                                                                     | Coded Responses (Shade in the appropriate circles)                                                                                                                                                                                                                                                                                                                                                       |
|------|----------------------------------------------------------------------------------------------|----------------------------------------------------------------------------------------------------------------------------------------------------------------------------------------------------------------------------------------------------------------------------------------------------------------------------------------------------------------------------------------------------------|
| 7.01 | In all with how many different men did you have anal or oral sex with in the past 12 months? | <p><i>[Record the number of men. If 000 skip to 8.01]</i></p> <div style="display: flex; justify-content: space-between; align-items: center;"> <div style="width: 80%;"> <p>888 = Refusal [skip to 8.01]</p> <p>999 = Don't know [skip to 8.01]</p> </div> <div style="width: 15%; text-align: center;"> <input style="width: 20px; height: 20px; border: 1px solid black;" type="text"/> </div> </div> |

Can you tell me the initials or use a pseudonym for the five men you most recently had anal or oral sex with in the past year, starting with the man with whom you most recently had anal or oral sex. A pseudonym is a fake name that you can use in place of their real name. If you use a pseudonym, use one that will allow you to remember the person that you are using it for. All the questions are regarding the period that you maintained a relationship with each partner, unless specified in contrary.

ENTER INITIALS OR PSEUDONYM OF FIVE MOST RESENT SEXUAL PARTNERS

|                                                                                     |                                                                                     |                                                                                     |
|-------------------------------------------------------------------------------------|-------------------------------------------------------------------------------------|-------------------------------------------------------------------------------------|
| 1. <input style="width: 100%; height: 20px; border: 1px solid black;" type="text"/> | 2. <input style="width: 100%; height: 20px; border: 1px solid black;" type="text"/> | 3. <input style="width: 100%; height: 20px; border: 1px solid black;" type="text"/> |
| 4. <input style="width: 100%; height: 20px; border: 1px solid black;" type="text"/> | 5. <input style="width: 100%; height: 20px; border: 1px solid black;" type="text"/> |                                                                                     |

|                                                                                                                                                                                                                        | FIVE MOST RESENT SEXUAL PARTNERS                                                                                                                                                                                             |                                                                                                                                                                                                                              |                                                                                                                                                                                                                              |                                                                                                                                                                                                                              |                                                                                                                                                                                                                              |
|------------------------------------------------------------------------------------------------------------------------------------------------------------------------------------------------------------------------|------------------------------------------------------------------------------------------------------------------------------------------------------------------------------------------------------------------------------|------------------------------------------------------------------------------------------------------------------------------------------------------------------------------------------------------------------------------|------------------------------------------------------------------------------------------------------------------------------------------------------------------------------------------------------------------------------|------------------------------------------------------------------------------------------------------------------------------------------------------------------------------------------------------------------------------|------------------------------------------------------------------------------------------------------------------------------------------------------------------------------------------------------------------------------|
|                                                                                                                                                                                                                        | 1.                                                                                                                                                                                                                           | 2.                                                                                                                                                                                                                           | 3.                                                                                                                                                                                                                           | 4.                                                                                                                                                                                                                           | 5.                                                                                                                                                                                                                           |
| 7.02 Record [NAME] age in years<br>88 = Refusal<br>99 = Don't Know                                                                                                                                                     | <input style="width: 20px; height: 20px; border: 1px solid black;" type="text"/>                                                                                                                                             | <input style="width: 20px; height: 20px; border: 1px solid black;" type="text"/>                                                                                                                                             | <input style="width: 20px; height: 20px; border: 1px solid black;" type="text"/>                                                                                                                                             | <input style="width: 20px; height: 20px; border: 1px solid black;" type="text"/>                                                                                                                                             | <input style="width: 20px; height: 20px; border: 1px solid black;" type="text"/>                                                                                                                                             |
| 7.021 How old is [NAME] relative to you?<br>01 = Older<br>02 = Same age<br>03 = Younger<br>88 = Refusal<br>99 = Don't know                                                                                             | <input type="radio"/> 01<br><input type="radio"/> 02<br><input type="radio"/> 03<br><input type="radio"/> 88<br><input type="radio"/> 99                                                                                     | <input type="radio"/> 01<br><input type="radio"/> 02<br><input type="radio"/> 03<br><input type="radio"/> 88<br><input type="radio"/> 99                                                                                     | <input type="radio"/> 01<br><input type="radio"/> 02<br><input type="radio"/> 03<br><input type="radio"/> 88<br><input type="radio"/> 99                                                                                     | <input type="radio"/> 01<br><input type="radio"/> 02<br><input type="radio"/> 03<br><input type="radio"/> 88<br><input type="radio"/> 99                                                                                     | <input type="radio"/> 01<br><input type="radio"/> 02<br><input type="radio"/> 03<br><input type="radio"/> 88<br><input type="radio"/> 99                                                                                     |
| 7.03 [NAME] level of education:<br>00 = Never been to school<br>01 = Quranic<br>02 = Primary<br>03 = Junior Secondary<br>04 = Senior Secondary<br>05 = Higher then Senior Secondary<br>88 = Refusal<br>99 = Don't Know | <input type="radio"/> 00<br><input type="radio"/> 01<br><input type="radio"/> 02<br><input type="radio"/> 03<br><input type="radio"/> 04<br><input type="radio"/> 05<br><input type="radio"/> 88<br><input type="radio"/> 99 | <input type="radio"/> 00<br><input type="radio"/> 01<br><input type="radio"/> 02<br><input type="radio"/> 03<br><input type="radio"/> 04<br><input type="radio"/> 05<br><input type="radio"/> 88<br><input type="radio"/> 99 | <input type="radio"/> 00<br><input type="radio"/> 01<br><input type="radio"/> 02<br><input type="radio"/> 03<br><input type="radio"/> 04<br><input type="radio"/> 05<br><input type="radio"/> 88<br><input type="radio"/> 99 | <input type="radio"/> 00<br><input type="radio"/> 01<br><input type="radio"/> 02<br><input type="radio"/> 03<br><input type="radio"/> 04<br><input type="radio"/> 05<br><input type="radio"/> 88<br><input type="radio"/> 99 | <input type="radio"/> 00<br><input type="radio"/> 01<br><input type="radio"/> 02<br><input type="radio"/> 03<br><input type="radio"/> 04<br><input type="radio"/> 05<br><input type="radio"/> 88<br><input type="radio"/> 99 |
| 7.031 What is [NAME]'s religion?<br>01 = Protestant/other Christian<br>02 = Muslim<br>03 = No religion<br>04 = Other<br>88 = Refusal<br>99 = Don't know                                                                | <input type="radio"/> 01<br><input type="radio"/> 02<br><input type="radio"/> 03<br><input type="radio"/> 04<br><input type="radio"/> 88<br><input type="radio"/> 99                                                         | <input type="radio"/> 01<br><input type="radio"/> 02<br><input type="radio"/> 03<br><input type="radio"/> 04<br><input type="radio"/> 88<br><input type="radio"/> 99                                                         | <input type="radio"/> 01<br><input type="radio"/> 02<br><input type="radio"/> 03<br><input type="radio"/> 04<br><input type="radio"/> 88<br><input type="radio"/> 99                                                         | <input type="radio"/> 01<br><input type="radio"/> 02<br><input type="radio"/> 03<br><input type="radio"/> 04<br><input type="radio"/> 88<br><input type="radio"/> 99                                                         | <input type="radio"/> 01<br><input type="radio"/> 02<br><input type="radio"/> 03<br><input type="radio"/> 04<br><input type="radio"/> 88<br><input type="radio"/> 99                                                         |

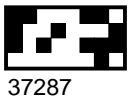

# TRUST QUESTIONNAIRE

## VISIT 1

Module 7 - Risk in MSM Sexual Network

|                                                                                                                                                                                                                                                              | FIVE MOST RESENT SEXUAL PARTNERS                                                                                                                                                                                                                                                     |                                                                                                                                                                                                                                                                                      |                                                                                                                                                                                                                                                                                      |                                                                                                                                                                                                                                                                                      |                                                                                                                                                                                                                                                                                      |
|--------------------------------------------------------------------------------------------------------------------------------------------------------------------------------------------------------------------------------------------------------------|--------------------------------------------------------------------------------------------------------------------------------------------------------------------------------------------------------------------------------------------------------------------------------------|--------------------------------------------------------------------------------------------------------------------------------------------------------------------------------------------------------------------------------------------------------------------------------------|--------------------------------------------------------------------------------------------------------------------------------------------------------------------------------------------------------------------------------------------------------------------------------------|--------------------------------------------------------------------------------------------------------------------------------------------------------------------------------------------------------------------------------------------------------------------------------------|--------------------------------------------------------------------------------------------------------------------------------------------------------------------------------------------------------------------------------------------------------------------------------------|
|                                                                                                                                                                                                                                                              | 1.                                                                                                                                                                                                                                                                                   | 2.                                                                                                                                                                                                                                                                                   | 3.                                                                                                                                                                                                                                                                                   | 4.                                                                                                                                                                                                                                                                                   | 5.                                                                                                                                                                                                                                                                                   |
| <b>7.032</b> What is [NAME]'s occupation?<br>01 = Not working<br>02 = Pupil/student<br>03 = Professional<br>04 = Self employed<br>05 = Entertainment/service<br>06 = Driver/laborer<br>07 = Military/police<br>08 = Other<br>88 = Refusal<br>99 = Don't know | <input type="radio"/> 01<br><input type="radio"/> 02<br><input type="radio"/> 03<br><input type="radio"/> 04<br><input type="radio"/> 05<br><input type="radio"/> 06<br><input type="radio"/> 07<br><input type="radio"/> 08<br><input type="radio"/> 88<br><input type="radio"/> 99 | <input type="radio"/> 01<br><input type="radio"/> 02<br><input type="radio"/> 03<br><input type="radio"/> 04<br><input type="radio"/> 05<br><input type="radio"/> 06<br><input type="radio"/> 07<br><input type="radio"/> 08<br><input type="radio"/> 88<br><input type="radio"/> 99 | <input type="radio"/> 01<br><input type="radio"/> 02<br><input type="radio"/> 03<br><input type="radio"/> 04<br><input type="radio"/> 05<br><input type="radio"/> 06<br><input type="radio"/> 07<br><input type="radio"/> 08<br><input type="radio"/> 88<br><input type="radio"/> 99 | <input type="radio"/> 01<br><input type="radio"/> 02<br><input type="radio"/> 03<br><input type="radio"/> 04<br><input type="radio"/> 05<br><input type="radio"/> 06<br><input type="radio"/> 07<br><input type="radio"/> 08<br><input type="radio"/> 88<br><input type="radio"/> 99 | <input type="radio"/> 01<br><input type="radio"/> 02<br><input type="radio"/> 03<br><input type="radio"/> 04<br><input type="radio"/> 05<br><input type="radio"/> 06<br><input type="radio"/> 07<br><input type="radio"/> 08<br><input type="radio"/> 88<br><input type="radio"/> 99 |
| <b>7.04</b> [NAME] marital status during the relationship period?<br>01 = Married to a woman<br>02 = Cohabiting<br>03 = Separated or divorced<br>04 = Widowed<br>05 = Single or Never Married<br>88 = Refusal<br>99 = Don't know                             | <input type="radio"/> 01<br><input type="radio"/> 02<br><input type="radio"/> 03<br><input type="radio"/> 04<br><input type="radio"/> 05<br><input type="radio"/> 88<br><input type="radio"/> 99                                                                                     | <input type="radio"/> 01<br><input type="radio"/> 02<br><input type="radio"/> 03<br><input type="radio"/> 04<br><input type="radio"/> 05<br><input type="radio"/> 88<br><input type="radio"/> 99                                                                                     | <input type="radio"/> 01<br><input type="radio"/> 02<br><input type="radio"/> 03<br><input type="radio"/> 04<br><input type="radio"/> 05<br><input type="radio"/> 88<br><input type="radio"/> 99                                                                                     | <input type="radio"/> 01<br><input type="radio"/> 02<br><input type="radio"/> 03<br><input type="radio"/> 04<br><input type="radio"/> 05<br><input type="radio"/> 88<br><input type="radio"/> 99                                                                                     | <input type="radio"/> 01<br><input type="radio"/> 02<br><input type="radio"/> 03<br><input type="radio"/> 04<br><input type="radio"/> 05<br><input type="radio"/> 88<br><input type="radio"/> 99                                                                                     |
| <b>7.05</b> How would you classify [NAME] socio-economic level, compared to yours?<br>01 = Lower<br>02 = The same<br>03 = Higher<br>88 = Refusal<br>99 = Don't Know                                                                                          | <input type="radio"/> 01<br><input type="radio"/> 02<br><input type="radio"/> 03<br><input type="radio"/> 88<br><input type="radio"/> 99                                                                                                                                             | <input type="radio"/> 01<br><input type="radio"/> 02<br><input type="radio"/> 03<br><input type="radio"/> 88<br><input type="radio"/> 99                                                                                                                                             | <input type="radio"/> 01<br><input type="radio"/> 02<br><input type="radio"/> 03<br><input type="radio"/> 88<br><input type="radio"/> 99                                                                                                                                             | <input type="radio"/> 01<br><input type="radio"/> 02<br><input type="radio"/> 03<br><input type="radio"/> 88<br><input type="radio"/> 99                                                                                                                                             | <input type="radio"/> 01<br><input type="radio"/> 02<br><input type="radio"/> 03<br><input type="radio"/> 88<br><input type="radio"/> 99                                                                                                                                             |
| <b>7.06</b> Rate the strength of friendship with [NAME] from 0 to 10, [0 being 'acquaintance' and 10 being 'best friend']<br>88 = Refusal<br>99 = Don't Know                                                                                                 | <input type="text"/>                                                                                                                                                                                                                                                                 | <input type="text"/>                                                                                                                                                                                                                                                                 | <input type="text"/>                                                                                                                                                                                                                                                                 | <input type="text"/>                                                                                                                                                                                                                                                                 | <input type="text"/>                                                                                                                                                                                                                                                                 |
| <b>7.061</b> How much do you trust [NAME]?<br>00 = Do not trust<br>01 = Neutral<br>02 = A little trust<br>03 = A lot of trust<br>88 = Refusal<br>99 = Don't know                                                                                             | <input type="radio"/> 00<br><input type="radio"/> 01<br><input type="radio"/> 02<br><input type="radio"/> 03<br><input type="radio"/> 88<br><input type="radio"/> 99                                                                                                                 | <input type="radio"/> 00<br><input type="radio"/> 01<br><input type="radio"/> 02<br><input type="radio"/> 03<br><input type="radio"/> 88<br><input type="radio"/> 99                                                                                                                 | <input type="radio"/> 00<br><input type="radio"/> 01<br><input type="radio"/> 02<br><input type="radio"/> 03<br><input type="radio"/> 88<br><input type="radio"/> 99                                                                                                                 | <input type="radio"/> 00<br><input type="radio"/> 01<br><input type="radio"/> 02<br><input type="radio"/> 03<br><input type="radio"/> 88<br><input type="radio"/> 99                                                                                                                 | <input type="radio"/> 00<br><input type="radio"/> 01<br><input type="radio"/> 02<br><input type="radio"/> 03<br><input type="radio"/> 88<br><input type="radio"/> 99                                                                                                                 |
| <b>7.07</b> [NAME] is what type of sexual partner:<br>01 = Regular<br>02 = Casual (By casual partner, this means a man that you have sex with, but you don't feel committed to)<br>88 = Refusal<br>99 = Don't know                                           | <input type="radio"/> 01<br><input type="radio"/> 02<br><input type="radio"/> 88<br><input type="radio"/> 99                                                                                                                                                                         | <input type="radio"/> 01<br><input type="radio"/> 02<br><input type="radio"/> 88<br><input type="radio"/> 99                                                                                                                                                                         | <input type="radio"/> 01<br><input type="radio"/> 02<br><input type="radio"/> 88<br><input type="radio"/> 99                                                                                                                                                                         | <input type="radio"/> 01<br><input type="radio"/> 02<br><input type="radio"/> 88<br><input type="radio"/> 99                                                                                                                                                                         | <input type="radio"/> 01<br><input type="radio"/> 02<br><input type="radio"/> 88<br><input type="radio"/> 99                                                                                                                                                                         |
| <b>7.071</b> What month and year did your relationship with [NAME] begin ?<br>88 = Refusal<br>99 = Don't know                                                                                                                                                | <input type="text"/><br>(month)<br><input type="text"/><br>(year)                                                                                                                                                                                                                    | <input type="text"/><br>(month)<br><input type="text"/><br>(year)                                                                                                                                                                                                                    | <input type="text"/><br>(month)<br><input type="text"/><br>(year)                                                                                                                                                                                                                    | <input type="text"/><br>(month)<br><input type="text"/><br>(year)                                                                                                                                                                                                                    | <input type="text"/><br>(month)<br><input type="text"/><br>(year)                                                                                                                                                                                                                    |
| <b>7.072</b> What month and year did your relationship with [NAME] end (MMYY)?<br>00 = Relationship still ongoing<br>88 = Refusal<br>99 = Don't know                                                                                                         | <input type="text"/><br>(month)<br><input type="text"/><br>(year)                                                                                                                                                                                                                    | <input type="text"/><br>(month)<br><input type="text"/><br>(year)                                                                                                                                                                                                                    | <input type="text"/><br>(month)<br><input type="text"/><br>(year)                                                                                                                                                                                                                    | <input type="text"/><br>(month)<br><input type="text"/><br>(year)                                                                                                                                                                                                                    | <input type="text"/><br>(month)<br><input type="text"/><br>(year)                                                                                                                                                                                                                    |
| <b>7.073</b> Did you meet [NAME] through the internet?<br>01 = No<br>02 = Yes<br>88 = Refusal<br>99 = Don't know                                                                                                                                             | <input type="radio"/> 01<br><input type="radio"/> 02<br><input type="radio"/> 88<br><input type="radio"/> 99                                                                                                                                                                         | <input type="radio"/> 01<br><input type="radio"/> 02<br><input type="radio"/> 88<br><input type="radio"/> 99                                                                                                                                                                         | <input type="radio"/> 01<br><input type="radio"/> 02<br><input type="radio"/> 88<br><input type="radio"/> 99                                                                                                                                                                         | <input type="radio"/> 01<br><input type="radio"/> 02<br><input type="radio"/> 88<br><input type="radio"/> 99                                                                                                                                                                         | <input type="radio"/> 01<br><input type="radio"/> 02<br><input type="radio"/> 88<br><input type="radio"/> 99                                                                                                                                                                         |



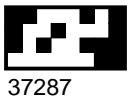

37287

# TRUST QUESTIONNAIRE

Module 7 - Risk in MSM Sexual Network

## VISIT 1

|                                                                                                                                                                                                                                                                              | FIVE MOST RESENT SEXUAL PARTNERS                                                                                                                                                                                             |                                                                                                                                                                                                                              |                                                                                                                                                                                                                              |                                                                                                                                                                                                                              |                                                                                                                                                                                                                              |
|------------------------------------------------------------------------------------------------------------------------------------------------------------------------------------------------------------------------------------------------------------------------------|------------------------------------------------------------------------------------------------------------------------------------------------------------------------------------------------------------------------------|------------------------------------------------------------------------------------------------------------------------------------------------------------------------------------------------------------------------------|------------------------------------------------------------------------------------------------------------------------------------------------------------------------------------------------------------------------------|------------------------------------------------------------------------------------------------------------------------------------------------------------------------------------------------------------------------------|------------------------------------------------------------------------------------------------------------------------------------------------------------------------------------------------------------------------------|
|                                                                                                                                                                                                                                                                              | 1.                                                                                                                                                                                                                           | 2.                                                                                                                                                                                                                           | 3.                                                                                                                                                                                                                           | 4.                                                                                                                                                                                                                           | 5.                                                                                                                                                                                                                           |
| <b>7.08</b> How frequently did you have sex with [NAME]?<br>01 = Almost every day<br>02 = A few times each week<br>03 = A few times each month<br>04 = Once a month or fewer times<br>77 = I had sex only once or twice with this partner<br>88 = Refusal<br>99 = Don't Know | <input type="radio"/> 01<br><input type="radio"/> 02<br><input type="radio"/> 03<br><input type="radio"/> 04<br><input type="radio"/> 77<br><input type="radio"/> 88<br><input type="radio"/> 99                             | <input type="radio"/> 01<br><input type="radio"/> 02<br><input type="radio"/> 03<br><input type="radio"/> 04<br><input type="radio"/> 77<br><input type="radio"/> 88<br><input type="radio"/> 99                             | <input type="radio"/> 01<br><input type="radio"/> 02<br><input type="radio"/> 03<br><input type="radio"/> 04<br><input type="radio"/> 77<br><input type="radio"/> 88<br><input type="radio"/> 99                             | <input type="radio"/> 01<br><input type="radio"/> 02<br><input type="radio"/> 03<br><input type="radio"/> 04<br><input type="radio"/> 77<br><input type="radio"/> 88<br><input type="radio"/> 99                             | <input type="radio"/> 01<br><input type="radio"/> 02<br><input type="radio"/> 03<br><input type="radio"/> 04<br><input type="radio"/> 77<br><input type="radio"/> 88<br><input type="radio"/> 99                             |
| <b>7.081</b> Does [NAME] encourage you to use condoms?<br>01 = No<br>02 = Yes<br>88 = Refusal<br>99 = Don't know                                                                                                                                                             | <input type="radio"/> 01<br><input type="radio"/> 02<br><input type="radio"/> 88<br><input type="radio"/> 99                                                                                                                 | <input type="radio"/> 01<br><input type="radio"/> 02<br><input type="radio"/> 88<br><input type="radio"/> 99                                                                                                                 | <input type="radio"/> 01<br><input type="radio"/> 02<br><input type="radio"/> 88<br><input type="radio"/> 99                                                                                                                 | <input type="radio"/> 01<br><input type="radio"/> 02<br><input type="radio"/> 88<br><input type="radio"/> 99                                                                                                                 | <input type="radio"/> 01<br><input type="radio"/> 02<br><input type="radio"/> 88<br><input type="radio"/> 99                                                                                                                 |
| <b>7.082</b> If you are HIV negative, does [NAME] encourage you to get tested for HIV?<br>01 = No<br>02 = Yes<br>88 = Refusal<br>99 = Don't know                                                                                                                             | <input type="radio"/> 01<br><input type="radio"/> 02<br><input type="radio"/> 88<br><input type="radio"/> 99                                                                                                                 | <input type="radio"/> 01<br><input type="radio"/> 02<br><input type="radio"/> 88<br><input type="radio"/> 99                                                                                                                 | <input type="radio"/> 01<br><input type="radio"/> 02<br><input type="radio"/> 88<br><input type="radio"/> 99                                                                                                                 | <input type="radio"/> 01<br><input type="radio"/> 02<br><input type="radio"/> 88<br><input type="radio"/> 99                                                                                                                 | <input type="radio"/> 01<br><input type="radio"/> 02<br><input type="radio"/> 88<br><input type="radio"/> 99                                                                                                                 |
| <b>7.09</b> How would you define [NAME] sexual orientation?<br>01 = Homosexual (gay)<br>02 = Bisexual<br>03 = Heterosexual<br>04 = Transgender<br>88 = Refusal<br>99 = Don't Know                                                                                            | <input type="radio"/> 01<br><input type="radio"/> 02<br><input type="radio"/> 03<br><input type="radio"/> 04<br><input type="radio"/> 88<br><input type="radio"/> 99                                                         | <input type="radio"/> 01<br><input type="radio"/> 02<br><input type="radio"/> 03<br><input type="radio"/> 04<br><input type="radio"/> 88<br><input type="radio"/> 99                                                         | <input type="radio"/> 01<br><input type="radio"/> 02<br><input type="radio"/> 03<br><input type="radio"/> 04<br><input type="radio"/> 88<br><input type="radio"/> 99                                                         | <input type="radio"/> 01<br><input type="radio"/> 02<br><input type="radio"/> 03<br><input type="radio"/> 04<br><input type="radio"/> 88<br><input type="radio"/> 99                                                         | <input type="radio"/> 01<br><input type="radio"/> 02<br><input type="radio"/> 03<br><input type="radio"/> 04<br><input type="radio"/> 88<br><input type="radio"/> 99                                                         |
| <b>7.091</b> What does [NAME] consider to be his gender?<br>01 = Man<br>02 = Woman<br>03 = Other (if other, specify below)<br>04 = Both man and woman<br>88 = Refusal<br>99 = Don't Know                                                                                     | <input type="radio"/> 01<br><input type="radio"/> 02<br><input type="radio"/> 03<br><input type="radio"/> 04<br><input type="radio"/> 88<br><input type="radio"/> 99                                                         | <input type="radio"/> 01<br><input type="radio"/> 02<br><input type="radio"/> 03<br><input type="radio"/> 04<br><input type="radio"/> 88<br><input type="radio"/> 99                                                         | <input type="radio"/> 01<br><input type="radio"/> 02<br><input type="radio"/> 03<br><input type="radio"/> 04<br><input type="radio"/> 88<br><input type="radio"/> 99                                                         | <input type="radio"/> 01<br><input type="radio"/> 02<br><input type="radio"/> 03<br><input type="radio"/> 04<br><input type="radio"/> 88<br><input type="radio"/> 99                                                         | <input type="radio"/> 01<br><input type="radio"/> 02<br><input type="radio"/> 03<br><input type="radio"/> 04<br><input type="radio"/> 88<br><input type="radio"/> 99                                                         |
| If other gender (03) selected above, please specify:      Other 1: _____      Other 2: _____<br>Other 3: _____      Other 4: _____      Other 5: _____                                                                                                                       |                                                                                                                                                                                                                              |                                                                                                                                                                                                                              |                                                                                                                                                                                                                              |                                                                                                                                                                                                                              |                                                                                                                                                                                                                              |
| <b>7.10</b> How would you rate [NAME] chance of acquiring the AIDS virus from 0 (impossible) to 10 (I think he/she has AIDS)?<br>88 = Refusal<br>99 = Don't know                                                                                                             | <input type="text"/> <input type="text"/>                                                                                                                                                                                    | <input type="text"/> <input type="text"/>                                                                                                                                                                                    | <input type="text"/> <input type="text"/>                                                                                                                                                                                    | <input type="text"/> <input type="text"/>                                                                                                                                                                                    | <input type="text"/> <input type="text"/>                                                                                                                                                                                    |
| <b>7.11</b> As far as you know, is [NAME] living with HIV?<br>01 = No<br>02 = Yes<br>88 = Refusal<br>99 = Don't Know                                                                                                                                                         | <input type="radio"/> 01<br><input type="radio"/> 02<br><input type="radio"/> 88<br><input type="radio"/> 99                                                                                                                 | <input type="radio"/> 01<br><input type="radio"/> 02<br><input type="radio"/> 88<br><input type="radio"/> 99                                                                                                                 | <input type="radio"/> 01<br><input type="radio"/> 02<br><input type="radio"/> 88<br><input type="radio"/> 99                                                                                                                 | <input type="radio"/> 01<br><input type="radio"/> 02<br><input type="radio"/> 88<br><input type="radio"/> 99                                                                                                                 | <input type="radio"/> 01<br><input type="radio"/> 02<br><input type="radio"/> 88<br><input type="radio"/> 99                                                                                                                 |
| <b>7.12</b> As far as you know, does [NAME] have any kind of sexually transmitted infection such as syphilis, gonorrhea or genital wart?<br>01 = No<br>02 = Yes<br>88 = Refusal<br>99 = Don't Know                                                                           | <input type="radio"/> 01<br><input type="radio"/> 02<br><input type="radio"/> 88<br><input type="radio"/> 99                                                                                                                 | <input type="radio"/> 01<br><input type="radio"/> 02<br><input type="radio"/> 88<br><input type="radio"/> 99                                                                                                                 | <input type="radio"/> 01<br><input type="radio"/> 02<br><input type="radio"/> 88<br><input type="radio"/> 99                                                                                                                 | <input type="radio"/> 01<br><input type="radio"/> 02<br><input type="radio"/> 88<br><input type="radio"/> 99                                                                                                                 | <input type="radio"/> 01<br><input type="radio"/> 02<br><input type="radio"/> 88<br><input type="radio"/> 99                                                                                                                 |
| <b>7.13</b> If you had oral sex with [NAME], how often was a condom used?<br>01 = Never<br>02 = Almost never<br>03 = About half the time<br>04 = Almost always<br>05 = Always<br>77 = Did not have oral sex with this partner<br>88 = Refusal<br>99 = Don't Know             | <input type="radio"/> 01<br><input type="radio"/> 02<br><input type="radio"/> 03<br><input type="radio"/> 04<br><input type="radio"/> 05<br><input type="radio"/> 77<br><input type="radio"/> 88<br><input type="radio"/> 99 | <input type="radio"/> 01<br><input type="radio"/> 02<br><input type="radio"/> 03<br><input type="radio"/> 04<br><input type="radio"/> 05<br><input type="radio"/> 77<br><input type="radio"/> 88<br><input type="radio"/> 99 | <input type="radio"/> 01<br><input type="radio"/> 02<br><input type="radio"/> 03<br><input type="radio"/> 04<br><input type="radio"/> 05<br><input type="radio"/> 77<br><input type="radio"/> 88<br><input type="radio"/> 99 | <input type="radio"/> 01<br><input type="radio"/> 02<br><input type="radio"/> 03<br><input type="radio"/> 04<br><input type="radio"/> 05<br><input type="radio"/> 77<br><input type="radio"/> 88<br><input type="radio"/> 99 | <input type="radio"/> 01<br><input type="radio"/> 02<br><input type="radio"/> 03<br><input type="radio"/> 04<br><input type="radio"/> 05<br><input type="radio"/> 77<br><input type="radio"/> 88<br><input type="radio"/> 99 |

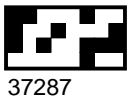

37287

**TRUST QUESTIONNAIRE**

Module 7 - Risk in MSM Sexual Network

**VISIT 1**

|                                                                                                                                                                                                                                                                                                                                                  | FIVE MOST RESENT SEXUAL PARTNERS                                                                                                                                                                                             |                                                                                                                                                                                                                              |                                                                                                                                                                                                                              |                                                                                                                                                                                                                              |                                                                                                                                                                                                                              |
|--------------------------------------------------------------------------------------------------------------------------------------------------------------------------------------------------------------------------------------------------------------------------------------------------------------------------------------------------|------------------------------------------------------------------------------------------------------------------------------------------------------------------------------------------------------------------------------|------------------------------------------------------------------------------------------------------------------------------------------------------------------------------------------------------------------------------|------------------------------------------------------------------------------------------------------------------------------------------------------------------------------------------------------------------------------|------------------------------------------------------------------------------------------------------------------------------------------------------------------------------------------------------------------------------|------------------------------------------------------------------------------------------------------------------------------------------------------------------------------------------------------------------------------|
|                                                                                                                                                                                                                                                                                                                                                  | 1.                                                                                                                                                                                                                           | 2.                                                                                                                                                                                                                           | 3.                                                                                                                                                                                                                           | 4.                                                                                                                                                                                                                           | 5.                                                                                                                                                                                                                           |
| <p>7.14 When you had receptive anal sex with [NAME] (your partner's penis introduced in your anus), how often was a condom used?</p> <p>01 = Never<br/>02 = Almost never<br/>03 = About half the time<br/>04 = Almost always<br/>05 = Always<br/>77 = Did not have receptive anal sex with this partner<br/>88 = Refusal<br/>99 = Don't know</p> | <input type="radio"/> 01<br><input type="radio"/> 02<br><input type="radio"/> 03<br><input type="radio"/> 04<br><input type="radio"/> 05<br><input type="radio"/> 77<br><input type="radio"/> 88<br><input type="radio"/> 99 | <input type="radio"/> 01<br><input type="radio"/> 02<br><input type="radio"/> 03<br><input type="radio"/> 04<br><input type="radio"/> 05<br><input type="radio"/> 77<br><input type="radio"/> 88<br><input type="radio"/> 99 | <input type="radio"/> 01<br><input type="radio"/> 02<br><input type="radio"/> 03<br><input type="radio"/> 04<br><input type="radio"/> 05<br><input type="radio"/> 77<br><input type="radio"/> 88<br><input type="radio"/> 99 | <input type="radio"/> 01<br><input type="radio"/> 02<br><input type="radio"/> 03<br><input type="radio"/> 04<br><input type="radio"/> 05<br><input type="radio"/> 77<br><input type="radio"/> 88<br><input type="radio"/> 99 | <input type="radio"/> 01<br><input type="radio"/> 02<br><input type="radio"/> 03<br><input type="radio"/> 04<br><input type="radio"/> 05<br><input type="radio"/> 77<br><input type="radio"/> 88<br><input type="radio"/> 99 |
| <p>7.15 When you had insertive anal sex with [NAME] (your penis introduced in your partner's anus), how often was a condom used?</p> <p>01 = Never<br/>02 = Almost never<br/>03 = About half the time<br/>04 = Almost always<br/>05 = Always<br/>77 = Did not have insertive anal sex with this partner<br/>88 = Refusal<br/>99 = Don't Know</p> | <input type="radio"/> 01<br><input type="radio"/> 02<br><input type="radio"/> 03<br><input type="radio"/> 04<br><input type="radio"/> 05<br><input type="radio"/> 77<br><input type="radio"/> 88<br><input type="radio"/> 99 | <input type="radio"/> 01<br><input type="radio"/> 02<br><input type="radio"/> 03<br><input type="radio"/> 04<br><input type="radio"/> 05<br><input type="radio"/> 77<br><input type="radio"/> 88<br><input type="radio"/> 99 | <input type="radio"/> 01<br><input type="radio"/> 02<br><input type="radio"/> 03<br><input type="radio"/> 04<br><input type="radio"/> 05<br><input type="radio"/> 77<br><input type="radio"/> 88<br><input type="radio"/> 99 | <input type="radio"/> 01<br><input type="radio"/> 02<br><input type="radio"/> 03<br><input type="radio"/> 04<br><input type="radio"/> 05<br><input type="radio"/> 77<br><input type="radio"/> 88<br><input type="radio"/> 99 | <input type="radio"/> 01<br><input type="radio"/> 02<br><input type="radio"/> 03<br><input type="radio"/> 04<br><input type="radio"/> 05<br><input type="radio"/> 77<br><input type="radio"/> 88<br><input type="radio"/> 99 |
| <p>7.17 As far as you know, did [NAME] have more than one sexual regular partner at the same time (for example, you and a wife or a regular lover)?</p> <p>01 = No<br/>02 = Yes<br/>88 = Refusal<br/>99 = Don't Know</p>                                                                                                                         | <input type="radio"/> 01<br><input type="radio"/> 02<br><input type="radio"/> 88<br><input type="radio"/> 99                                                                                                                 | <input type="radio"/> 01<br><input type="radio"/> 02<br><input type="radio"/> 88<br><input type="radio"/> 99                                                                                                                 | <input type="radio"/> 01<br><input type="radio"/> 02<br><input type="radio"/> 88<br><input type="radio"/> 99                                                                                                                 | <input type="radio"/> 01<br><input type="radio"/> 02<br><input type="radio"/> 88<br><input type="radio"/> 99                                                                                                                 | <input type="radio"/> 01<br><input type="radio"/> 02<br><input type="radio"/> 88<br><input type="radio"/> 99                                                                                                                 |
| <p>7.201 Did you have sex the first time you met [NAME]?</p> <p>01 = No<br/>02 = Yes<br/>88 = Refusal<br/>99 = Don't Know</p>                                                                                                                                                                                                                    | <input type="radio"/> 01<br><input type="radio"/> 02<br><input type="radio"/> 88<br><input type="radio"/> 99                                                                                                                 | <input type="radio"/> 01<br><input type="radio"/> 02<br><input type="radio"/> 88<br><input type="radio"/> 99                                                                                                                 | <input type="radio"/> 01<br><input type="radio"/> 02<br><input type="radio"/> 88<br><input type="radio"/> 99                                                                                                                 | <input type="radio"/> 01<br><input type="radio"/> 02<br><input type="radio"/> 88<br><input type="radio"/> 99                                                                                                                 | <input type="radio"/> 01<br><input type="radio"/> 02<br><input type="radio"/> 88<br><input type="radio"/> 99                                                                                                                 |
| <p>7.211 Did you pay money, favors or drugs to [NAME] to have sex?</p> <p>01 = No<br/>02 = Yes<br/>88 = Refusal<br/>99 = Don't Know</p>                                                                                                                                                                                                          | <input type="radio"/> 01<br><input type="radio"/> 02<br><input type="radio"/> 88<br><input type="radio"/> 99                                                                                                                 | <input type="radio"/> 01<br><input type="radio"/> 02<br><input type="radio"/> 88<br><input type="radio"/> 99                                                                                                                 | <input type="radio"/> 01<br><input type="radio"/> 02<br><input type="radio"/> 88<br><input type="radio"/> 99                                                                                                                 | <input type="radio"/> 01<br><input type="radio"/> 02<br><input type="radio"/> 88<br><input type="radio"/> 99                                                                                                                 | <input type="radio"/> 01<br><input type="radio"/> 02<br><input type="radio"/> 88<br><input type="radio"/> 99                                                                                                                 |
| <p>7.221 Did you receive money, favors or drugs from [NAME] in exchange for sex?</p> <p>01 = No<br/>02 = Yes<br/>88 = Refusal<br/>99 = Don't Know</p>                                                                                                                                                                                            | <input type="radio"/> 01<br><input type="radio"/> 02<br><input type="radio"/> 88<br><input type="radio"/> 99                                                                                                                 | <input type="radio"/> 01<br><input type="radio"/> 02<br><input type="radio"/> 88<br><input type="radio"/> 99                                                                                                                 | <input type="radio"/> 01<br><input type="radio"/> 02<br><input type="radio"/> 88<br><input type="radio"/> 99                                                                                                                 | <input type="radio"/> 01<br><input type="radio"/> 02<br><input type="radio"/> 88<br><input type="radio"/> 99                                                                                                                 | <input type="radio"/> 01<br><input type="radio"/> 02<br><input type="radio"/> 88<br><input type="radio"/> 99                                                                                                                 |
| <p>7.231 Did you have sex with [NAME] while under alcohol or drug influence?</p> <p>01 = No<br/>02 = Yes<br/>88 = Refusal<br/>99 = Don't Know</p>                                                                                                                                                                                                | <input type="radio"/> 01<br><input type="radio"/> 02<br><input type="radio"/> 88<br><input type="radio"/> 99                                                                                                                 | <input type="radio"/> 01<br><input type="radio"/> 02<br><input type="radio"/> 88<br><input type="radio"/> 99                                                                                                                 | <input type="radio"/> 01<br><input type="radio"/> 02<br><input type="radio"/> 88<br><input type="radio"/> 99                                                                                                                 | <input type="radio"/> 01<br><input type="radio"/> 02<br><input type="radio"/> 88<br><input type="radio"/> 99                                                                                                                 | <input type="radio"/> 01<br><input type="radio"/> 02<br><input type="radio"/> 88<br><input type="radio"/> 99                                                                                                                 |
| <p>7.232 Has [NAME] had sex with [Person 2] in the past 12 months?</p> <p>01 = No<br/>02 = Yes<br/>88 = Refusal<br/>99 = Don't know</p>                                                                                                                                                                                                          | <input type="radio"/> 01<br><input type="radio"/> 02<br><input type="radio"/> 88<br><input type="radio"/> 99                                                                                                                 |                                                                                                                                                                                                                              |                                                                                                                                                                                                                              |                                                                                                                                                                                                                              |                                                                                                                                                                                                                              |
| <p>7.233 Has [NAME] had sex with [Person 3] in the past 12 months?</p> <p>01 = No<br/>02 = Yes<br/>88 = Refusal<br/>99 = Don't know</p>                                                                                                                                                                                                          | <input type="radio"/> 01<br><input type="radio"/> 02<br><input type="radio"/> 88<br><input type="radio"/> 99                                                                                                                 | <input type="radio"/> 01<br><input type="radio"/> 02<br><input type="radio"/> 88<br><input type="radio"/> 99                                                                                                                 |                                                                                                                                                                                                                              |                                                                                                                                                                                                                              |                                                                                                                                                                                                                              |
| <p>7.234 Has [NAME] had sex with [Person 4] in the past 12 months?</p> <p>01 = No<br/>02 = Yes<br/>88 = Refusal<br/>99 = Don't know</p>                                                                                                                                                                                                          | <input type="radio"/> 01<br><input type="radio"/> 02<br><input type="radio"/> 88<br><input type="radio"/> 99                                                                                                                 | <input type="radio"/> 01<br><input type="radio"/> 02<br><input type="radio"/> 88<br><input type="radio"/> 99                                                                                                                 | <input type="radio"/> 01<br><input type="radio"/> 02<br><input type="radio"/> 88<br><input type="radio"/> 99                                                                                                                 |                                                                                                                                                                                                                              |                                                                                                                                                                                                                              |

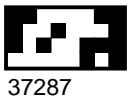

# TRUST QUESTIONNAIRE

## VISIT 1

### MODULE 8 - Composition and Influence of MSM Social Network

|                                                                                                                                                           | FIVE MOST RESENT SEXUAL PARTNERS                                                                             |                                                                                                              |                                                                                                              |                                                                                                              |                      |
|-----------------------------------------------------------------------------------------------------------------------------------------------------------|--------------------------------------------------------------------------------------------------------------|--------------------------------------------------------------------------------------------------------------|--------------------------------------------------------------------------------------------------------------|--------------------------------------------------------------------------------------------------------------|----------------------|
|                                                                                                                                                           | 1.                                                                                                           | 2.                                                                                                           | 3.                                                                                                           | 4.                                                                                                           | 5.                   |
| 7.235 Has [NAME] had sex with [Person 5] in the past 12 months?<br>01 = No<br>02 = Yes<br>88 = Refusal<br>99 = Don't know                                 | <input type="radio"/> 01<br><input type="radio"/> 02<br><input type="radio"/> 88<br><input type="radio"/> 99 | <input type="radio"/> 01<br><input type="radio"/> 02<br><input type="radio"/> 88<br><input type="radio"/> 99 | <input type="radio"/> 01<br><input type="radio"/> 02<br><input type="radio"/> 88<br><input type="radio"/> 99 | <input type="radio"/> 01<br><input type="radio"/> 02<br><input type="radio"/> 88<br><input type="radio"/> 99 |                      |
| 7.27 From 0 (not sure at all) to 10 (100% sure), how sure are you about the information you have just given on [NAME]?<br>88 = Refusal<br>99 = Don't know | <input type="text"/>                                                                                         | <input type="text"/>                                                                                         | <input type="text"/>                                                                                         | <input type="text"/>                                                                                         | <input type="text"/> |

### MODULE 8 - Composition and Influence of MSM Social Network

8.01 Now, I would like you to think of all of the men that you know who have sex with other men? Can you tell me the initials or use a pseudonym for the five men you know who have sex with other men and with whom you would be most likely to discuss personal matters of importance to you. A pseudonym is a fake name that you can use in place of their real name. If you use a pseudonym, use one that will allow you to remember the person that you are using it for.

ENTER INITIALS OR PSEUDONYM OF FIVE CLOSEST MSM FRIENDS IN THE SPACE PROVIDED BELOW

1.

2.

3.

4.

5.

|                                                                                                                                                                                                                   | FIVE MOST RESENT SEXUAL PARTNERS                                                                                                                                     |                                                                                                                                                                      |                                                                                                                                                                      |                                                                                                                                                                      |                                                                                                                                                                      |
|-------------------------------------------------------------------------------------------------------------------------------------------------------------------------------------------------------------------|----------------------------------------------------------------------------------------------------------------------------------------------------------------------|----------------------------------------------------------------------------------------------------------------------------------------------------------------------|----------------------------------------------------------------------------------------------------------------------------------------------------------------------|----------------------------------------------------------------------------------------------------------------------------------------------------------------------|----------------------------------------------------------------------------------------------------------------------------------------------------------------------|
|                                                                                                                                                                                                                   | 1.                                                                                                                                                                   | 2.                                                                                                                                                                   | 3.                                                                                                                                                                   | 4.                                                                                                                                                                   | 5.                                                                                                                                                                   |
| 8.02 How frequently do you discuss HIV with [EACH PERSON]<br>01 = At least once a week<br>02 = At least once a month<br>03 = Less than once a month<br>04 = Never<br>88 = Refusal<br>99 = Don't know this person? | <input type="radio"/> 01<br><input type="radio"/> 02<br><input type="radio"/> 03<br><input type="radio"/> 04<br><input type="radio"/> 88<br><input type="radio"/> 99 | <input type="radio"/> 01<br><input type="radio"/> 02<br><input type="radio"/> 03<br><input type="radio"/> 04<br><input type="radio"/> 88<br><input type="radio"/> 99 | <input type="radio"/> 01<br><input type="radio"/> 02<br><input type="radio"/> 03<br><input type="radio"/> 04<br><input type="radio"/> 88<br><input type="radio"/> 99 | <input type="radio"/> 01<br><input type="radio"/> 02<br><input type="radio"/> 03<br><input type="radio"/> 04<br><input type="radio"/> 88<br><input type="radio"/> 99 | <input type="radio"/> 01<br><input type="radio"/> 02<br><input type="radio"/> 03<br><input type="radio"/> 04<br><input type="radio"/> 88<br><input type="radio"/> 99 |
| 8.04 Has [NAME] ever encouraged you to make sure a condom is used when you have sex with another man?<br>00 = No<br>01 = Yes<br>88 = Refused<br>99 = Don't know                                                   | <input type="radio"/> 00<br><input type="radio"/> 01<br><input type="radio"/> 88<br><input type="radio"/> 99                                                         | <input type="radio"/> 00<br><input type="radio"/> 01<br><input type="radio"/> 88<br><input type="radio"/> 99                                                         | <input type="radio"/> 00<br><input type="radio"/> 01<br><input type="radio"/> 88<br><input type="radio"/> 99                                                         | <input type="radio"/> 00<br><input type="radio"/> 01<br><input type="radio"/> 88<br><input type="radio"/> 99                                                         | <input type="radio"/> 00<br><input type="radio"/> 01<br><input type="radio"/> 88<br><input type="radio"/> 99                                                         |
| 8.05 Does [NAME] know (Person 2)?<br>01 = No<br>02 = Yes<br>88 = Refusal<br>99 = Don't know                                                                                                                       | <input type="radio"/> 01<br><input type="radio"/> 02<br><input type="radio"/> 88<br><input type="radio"/> 99                                                         |                                                                                                                                                                      |                                                                                                                                                                      |                                                                                                                                                                      |                                                                                                                                                                      |
| 8.06 Does [NAME] know (Person 3)?<br>01 = No<br>02 = Yes<br>88 = Refusal<br>99 = Don't know                                                                                                                       | <input type="radio"/> 01<br><input type="radio"/> 02<br><input type="radio"/> 88<br><input type="radio"/> 99                                                         | <input type="radio"/> 01<br><input type="radio"/> 02<br><input type="radio"/> 88<br><input type="radio"/> 99                                                         |                                                                                                                                                                      |                                                                                                                                                                      |                                                                                                                                                                      |
| 8.07 Does [NAME] know (Person 4)?<br>01 = No<br>02 = Yes<br>88 = Refusal<br>99 = Don't know                                                                                                                       | <input type="radio"/> 01<br><input type="radio"/> 02<br><input type="radio"/> 88<br><input type="radio"/> 99                                                         | <input type="radio"/> 01<br><input type="radio"/> 02<br><input type="radio"/> 88<br><input type="radio"/> 99                                                         | <input type="radio"/> 01<br><input type="radio"/> 02<br><input type="radio"/> 88<br><input type="radio"/> 99                                                         |                                                                                                                                                                      |                                                                                                                                                                      |
| 8.08 Does [NAME] know (Person 5)?<br>01 = No<br>02 = Yes<br>88 = Refusal<br>99 = Don't know                                                                                                                       | <input type="radio"/> 01<br><input type="radio"/> 02<br><input type="radio"/> 88<br><input type="radio"/> 99                                                         | <input type="radio"/> 01<br><input type="radio"/> 02<br><input type="radio"/> 88<br><input type="radio"/> 99                                                         | <input type="radio"/> 01<br><input type="radio"/> 02<br><input type="radio"/> 88<br><input type="radio"/> 99                                                         | <input type="radio"/> 01<br><input type="radio"/> 02<br><input type="radio"/> 88<br><input type="radio"/> 99                                                         |                                                                                                                                                                      |

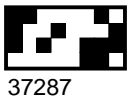

37287

# TRUST QUESTIONNAIRE

VISIT 1

## Module 9 - Condom Negotiation

"I'm going to ask you several questions about using condoms and how difficult you may find it to negotiate condom use in different circumstances. For each situation, you can tell me if you find it very difficult, somewhat difficult, not very difficult, or not at all difficult."

| No.  | Question                                                                                                                                      | Coded Responses (Shade in the appropriate circles)                                                                                                                                                                                                                   |
|------|-----------------------------------------------------------------------------------------------------------------------------------------------|----------------------------------------------------------------------------------------------------------------------------------------------------------------------------------------------------------------------------------------------------------------------|
| 9.07 | How difficult or easy is it for you to insist on condom use with a male sexual partner with whom you haven't always used condoms in the past? | <input type="radio"/> 01 = Very difficult <input type="radio"/> 04 = Not at all difficult<br><input type="radio"/> 02 = Somewhat difficult <input type="radio"/> 88 = Refusal<br><input type="radio"/> 03 = Not very difficult <input type="radio"/> 99 = Don't know |
| 9.10 | How difficult or easy is it for you to insist on condom use with a male sexual partner that provides you with regular, economic support?      | <input type="radio"/> 01 = Very difficult <input type="radio"/> 04 = Not at all difficult<br><input type="radio"/> 02 = Somewhat difficult <input type="radio"/> 88 = Refusal<br><input type="radio"/> 03 = Not very difficult <input type="radio"/> 99 = Don't know |
| 9.12 | How difficult or easy is it for you to negotiate using a condom during oral sex with your male sexual partner?                                | <input type="radio"/> 01 = Very difficult <input type="radio"/> 04 = Not at all difficult<br><input type="radio"/> 02 = Somewhat difficult <input type="radio"/> 88 = Refusal<br><input type="radio"/> 03 = Not very difficult <input type="radio"/> 99 = Don't know |

## Module 10 - Social Capital

"Now, I would like to ask you some questions about your social life with other MSM in your group of friends. I'm going to read some phrases and you can tell me if you strongly agree, mostly agree, mostly disagree, or strongly disagree."

| No.   | Question                                                                                                | Coded Responses (Shade in the appropriate circles)                                                                                                                                                                                         |
|-------|---------------------------------------------------------------------------------------------------------|--------------------------------------------------------------------------------------------------------------------------------------------------------------------------------------------------------------------------------------------|
| 10.01 | You can count on other MSM in your group of friends if you need to borrow money.                        | <input type="radio"/> 00 = Strongly disagree <input type="radio"/> 03 = Strongly agree<br><input type="radio"/> 01 = Disagree <input type="radio"/> 88 = Refusal<br><input type="radio"/> 02 = Agree <input type="radio"/> 99 = Don't know |
| 10.02 | You can count on other MSM in your group of friends to accompany you to the doctor or hospital          | <input type="radio"/> 00 = Strongly disagree <input type="radio"/> 03 = Strongly agree<br><input type="radio"/> 01 = Disagree <input type="radio"/> 88 = Refusal<br><input type="radio"/> 02 = Agree <input type="radio"/> 99 = Don't know |
| 10.03 | You can count on other MSM in your group of friends if you need to talk about your problems.            | <input type="radio"/> 00 = Strongly disagree <input type="radio"/> 03 = Strongly agree<br><input type="radio"/> 01 = Disagree <input type="radio"/> 88 = Refusal<br><input type="radio"/> 02 = Agree <input type="radio"/> 99 = Don't know |
| 10.04 | In general, MSM in your group of friends only worry about themselves.                                   | <input type="radio"/> 00 = Strongly disagree <input type="radio"/> 03 = Strongly agree<br><input type="radio"/> 01 = Disagree <input type="radio"/> 88 = Refusal<br><input type="radio"/> 02 = Agree <input type="radio"/> 99 = Don't know |
| 10.05 | You can count on other MSM in your group of friends if you need somewhere to stay.                      | <input type="radio"/> 00 = Strongly disagree <input type="radio"/> 03 = Strongly agree<br><input type="radio"/> 01 = Disagree <input type="radio"/> 88 = Refusal<br><input type="radio"/> 02 = Agree <input type="radio"/> 99 = Don't know |
| 10.06 | You can count on other MSM in your group of friends to help deal with a violent or difficult situation. | <input type="radio"/> 00 = Strongly disagree <input type="radio"/> 03 = Strongly agree<br><input type="radio"/> 01 = Disagree <input type="radio"/> 88 = Refusal<br><input type="radio"/> 02 = Agree <input type="radio"/> 99 = Don't know |
| 10.07 | You can count on other MSM in your group of friends to help you find other MSM.                         | <input type="radio"/> 00 = Strongly disagree <input type="radio"/> 03 = Strongly agree<br><input type="radio"/> 01 = Disagree <input type="radio"/> 88 = Refusal<br><input type="radio"/> 02 = Agree <input type="radio"/> 99 = Don't know |
| 10.08 | You can count on other MSM in your group of friends to support the use of condoms.                      | <input type="radio"/> 00 = Strongly disagree <input type="radio"/> 03 = Strongly agree<br><input type="radio"/> 01 = Disagree <input type="radio"/> 88 = Refusal<br><input type="radio"/> 02 = Agree <input type="radio"/> 99 = Don't know |
| 10.09 | The group of MSM with whom you socialize with is a mix of straight people and MSM.                      | <input type="radio"/> 00 = Strongly disagree <input type="radio"/> 03 = Strongly agree<br><input type="radio"/> 01 = Disagree <input type="radio"/> 88 = Refusal<br><input type="radio"/> 02 = Agree <input type="radio"/> 99 = Don't know |

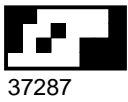

37287

# TRUST QUESTIONNAIRE

## MODULE 10 - Social Capital

VISIT 1

| No.   | Question                                                                                                                                                                                                | Coded Responses (Shade in the appropriate circles)                                                                                                                                                               |                                                                                                                                                                                                                                                                                                                                |
|-------|---------------------------------------------------------------------------------------------------------------------------------------------------------------------------------------------------------|------------------------------------------------------------------------------------------------------------------------------------------------------------------------------------------------------------------|--------------------------------------------------------------------------------------------------------------------------------------------------------------------------------------------------------------------------------------------------------------------------------------------------------------------------------|
| 10.10 | In general the MSM you socialize with are always arguing amongst each other.                                                                                                                            | <input type="radio"/> 00 = Strongly disagree<br><input type="radio"/> 01 = Disagree<br><input type="radio"/> 02 = Agree                                                                                          | <input type="radio"/> 03 = Strongly agree<br><input type="radio"/> 88 = Refusal<br><input type="radio"/> 99 = Don't know                                                                                                                                                                                                       |
| 10.11 | You can trust the majority of the MSM you know.                                                                                                                                                         | <input type="radio"/> 00 = Strongly disagree<br><input type="radio"/> 01 = Disagree<br><input type="radio"/> 02 = Agree                                                                                          | <input type="radio"/> 03 = Strongly agree<br><input type="radio"/> 88 = Refusal<br><input type="radio"/> 99 = Don't know                                                                                                                                                                                                       |
| 10.13 | In the past 12 months, how often have you participated in a meeting, march, rally, or gathering to promote the rights of MSM?                                                                           | <input type="radio"/> 00 = Never<br><input type="radio"/> 01 = Once<br><input type="radio"/> 02 = A couple of times                                                                                              | <input type="radio"/> 03 = Frequently<br><input type="radio"/> 88 = Refusal<br><input type="radio"/> 99 = Don't know                                                                                                                                                                                                           |
| 10.14 | In the past 12 months, how often have you gotten together with other men who have sex with MSM to speak with government officials or political leaders to address a problem or common issue facing MSM? | <input type="radio"/> 00 = Never<br><input type="radio"/> 01 = Once<br><input type="radio"/> 02 = A couple of times                                                                                              | <input type="radio"/> 03 = Frequently<br><input type="radio"/> 88 = Refusal<br><input type="radio"/> 99 = Don't know                                                                                                                                                                                                           |
| 10.15 | In the past 12 months, how often have you joined together with other MSM to address a common problem facing MSM?                                                                                        | <input type="radio"/> 00 = Never<br><input type="radio"/> 01 = Once<br><input type="radio"/> 02 = A couple of times                                                                                              | <input type="radio"/> 03 = Frequently<br><input type="radio"/> 88 = Refusal<br><input type="radio"/> 99 = Don't know                                                                                                                                                                                                           |
| 10.16 | In the past 12 months, how often have you participated in an HIV prevention organization or MSM rights group?                                                                                           | <input type="radio"/> 00 = Never<br><input type="radio"/> 01 = Once<br><input type="radio"/> 02 = A couple of times                                                                                              | <input type="radio"/> 03 = Frequently<br><input type="radio"/> 88 = Refusal<br><input type="radio"/> 99 = Don't know                                                                                                                                                                                                           |
| 10.22 | In the past 12 months, how often have you gone into a gay or bisexual chat room on the internet?<br>Was it:                                                                                             | <input type="radio"/> 01 = Did not go<br><input type="radio"/> 02 = Once a month or less<br><input type="radio"/> 03 = About once a week<br><input type="radio"/> 04 = Several times a week                      | <input type="radio"/> 05 = About once a day<br><input type="radio"/> 06 = Several times a day<br><input type="radio"/> 88 = Refusal<br><input type="radio"/> 99 = Don't know                                                                                                                                                   |
| 10.23 | In the past 12 months, how often have you used the Internet to look for male sexual partners?<br>Was it:                                                                                                | <input type="radio"/> 01 = Did not use [skip to module 11]<br><input type="radio"/> 02 = Once a month or less<br><input type="radio"/> 03 = About once a week<br><input type="radio"/> 04 = Several times a week | <input type="radio"/> 05 = About once a day<br><input type="radio"/> 06 = Several times a day<br><input type="radio"/> 88 = Refusal [skip to module 11]<br><input type="radio"/> 99 = Don't know [skip to module 11]                                                                                                           |
| 10.24 | Which social networking sites did you mainly use?<br><br>(Select all that apply by shading in the circles provided. If other, refusal or don't know, then fill in the box provided)                     | <input type="radio"/> Facebook<br><input type="radio"/> Gay.com<br><input type="radio"/> Blackberry messenger<br><input type="radio"/> Twitter<br><input type="radio"/> Gaydar.co.uk                             | <input type="radio"/> Manjam.com<br><input type="radio"/> Badoo.com<br><input type="radio"/> Whatsapp (Mobile app)<br><input type="radio"/> 2GO<br><input type="radio"/> bdclive.com<br><br><input type="radio"/> Other<br><input type="radio"/> Refusal<br><input type="radio"/> Don't know<br><br>(If other, specify): _____ |
| 10.25 | What devices did you mainly use?<br><br>(Select all that apply by shading in the circles provided. If other, refusal or don't know, then fill in the box provided)                                      | <input type="radio"/> Desktop/Laptop/tablet<br><input type="radio"/> Smartphone/Phablet<br><input type="radio"/> Feature phone                                                                                   | <input type="radio"/> Other<br><input type="radio"/> Refusal<br><input type="radio"/> Don't know<br><br>(If other, specify): _____                                                                                                                                                                                             |

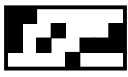

37287

# TRUST QUESTIONNAIRE

VISIT 1

## Module 11 - Exposure to Health Information

"In this next section, I will be asking you some questions so that I can understand how much health information you may have been exposed to. This is the last section and it will be very short"

| No.   | Question                                                                                                         | Coded Responses (Shade in the appropriate circles)                                                                                                                                                                                                                                                                                                                                                    |
|-------|------------------------------------------------------------------------------------------------------------------|-------------------------------------------------------------------------------------------------------------------------------------------------------------------------------------------------------------------------------------------------------------------------------------------------------------------------------------------------------------------------------------------------------|
| 11.01 | In the last 12 months, have you received information on prevention HIV infection from sex between men and women? | <input type="radio"/> 01 = No [skip to 11.03]<br><input type="radio"/> 02 = Yes<br><br><input type="radio"/> 88 = Refusal [skip to 11.03]<br><input type="radio"/> 99 = Don't know [skip to 11.03]                                                                                                                                                                                                    |
| 11.02 | Where did you receive this information?                                                                          | <input type="radio"/> 01 = Health Facility<br><input type="radio"/> 02 = Peer Educator/workshop<br><input type="radio"/> 03 = School<br><input type="radio"/> 04 = Internet<br><input type="radio"/> 05 = Friends<br><input type="radio"/> 06 = Media<br><input type="radio"/> 88 = Refusal<br><input type="radio"/> 99 = Don't know                                                                  |
| 11.03 | In the last 12 months, have you received information on prevention of HIV infection from sex between men?        | <input type="radio"/> 01 = No [skip to 11.05]<br><input type="radio"/> 02 = Yes<br><br><input type="radio"/> 88 = Refusal [skip to 11.05]<br><input type="radio"/> 99 = Don't know [skip to 11.05]                                                                                                                                                                                                    |
| 11.04 | Where did you get this information?                                                                              | <input type="radio"/> 01 = Health Facility<br><input type="radio"/> 02 = Peer Educator/workshop<br><input type="radio"/> 03 = School<br><input type="radio"/> 04 = Internet<br><input type="radio"/> 05 = Friends<br><input type="radio"/> 06 = Media<br><input type="radio"/> 88 = Refusal<br><input type="radio"/> 99 = Don't know                                                                  |
| 11.05 | In the last 12 months, how worried would you say you have been about HIV/AIDS?                                   | <input type="radio"/> 01 = Not at all worried<br><input type="radio"/> 02 = Not very worried<br><input type="radio"/> 03 = Somewhat worried<br><input type="radio"/> 04 = Very worried<br><input type="radio"/> 88 = Refusal<br><input type="radio"/> 99 = Don't know                                                                                                                                 |
| 11.06 | In the last 12 months, have you participated in any talks or meetings related to HIV/AIDS?                       | <input type="radio"/> 01 = No [skip to 11.08]<br><input type="radio"/> 02 = Yes<br><br><input type="radio"/> 88 = Refusal [skip to 11.08]<br><input type="radio"/> 99 = Don't know [skip to 11.08]                                                                                                                                                                                                    |
| 11.07 | Who hosted these talks or meetings?                                                                              | <input type="radio"/> 01 = ICARH<br><input type="radio"/> 02 = POP Council<br><input type="radio"/> 03 = Heartland Alliance<br><input type="radio"/> 04 = NACA (If other, specify): _____<br><input type="radio"/> 05 = Other<br><input type="radio"/> 88 = Refusal<br><input type="radio"/> 99 = Don't know                                                                                          |
| 11.08 | In the last 12 months, have you participated in any talks or meetings related to HIV/AIDS with other MSM?        | <input type="radio"/> 01 = No information [End Questionnaire]<br><input type="radio"/> 02 = Health Facility<br><input type="radio"/> 03 = Peer Educator/workshop<br><input type="radio"/> 04 = School<br><input type="radio"/> 88 = Refusal<br><input type="radio"/> 99 = Don't know<br><input type="radio"/> 05 = Internet<br><input type="radio"/> 06 = Friends<br><input type="radio"/> 07 = Media |
| 11.09 | Who hosted these talks or meetings with other MSM?                                                               | <input type="radio"/> 01 = Heartland<br><input type="radio"/> 02 = ICARH<br><input type="radio"/> 03 = CRH<br><input type="radio"/> 04 = Population council<br><input type="radio"/> 05 = IMH initiative<br><input type="radio"/> 06 = MSH<br><input type="radio"/> 07 = NCAP<br><input type="radio"/> 08 = FHI<br><input type="radio"/> 88 = Refusal<br><input type="radio"/> 99 = Don't know        |

*End of questionnaire*

*"Thank you for taking the time to sit with me. I know we have gone through many questions and I really appreciate your time and openness. We are finished with the long part of the study. Do you feel ready to proceed with clinical care?"*

*Perform HCT (if Visit 1-7 and the participant was negative at previous visit or status unknown),*

*Or escort to Nurse Case Manager (if Visit 1-7 and the participant's HIV status is positive)*
